# Supplementary material for: Disabled Homolog 2 Controls Prometastatic Activity of Tumor-Associated Macrophages
Source: Oxford University Press journal article supplement (doi:10.1158/2159-8290.cd-20-0036), 2020-07-10
Supplement: 21598290cd200036-sup-235391_2_supp_6396083_qchhxp.docx [file 21598290cd200036-sup-235391_2_supp_6396083_qchhxp.docx]

Supplementary materials

**Figures**

**
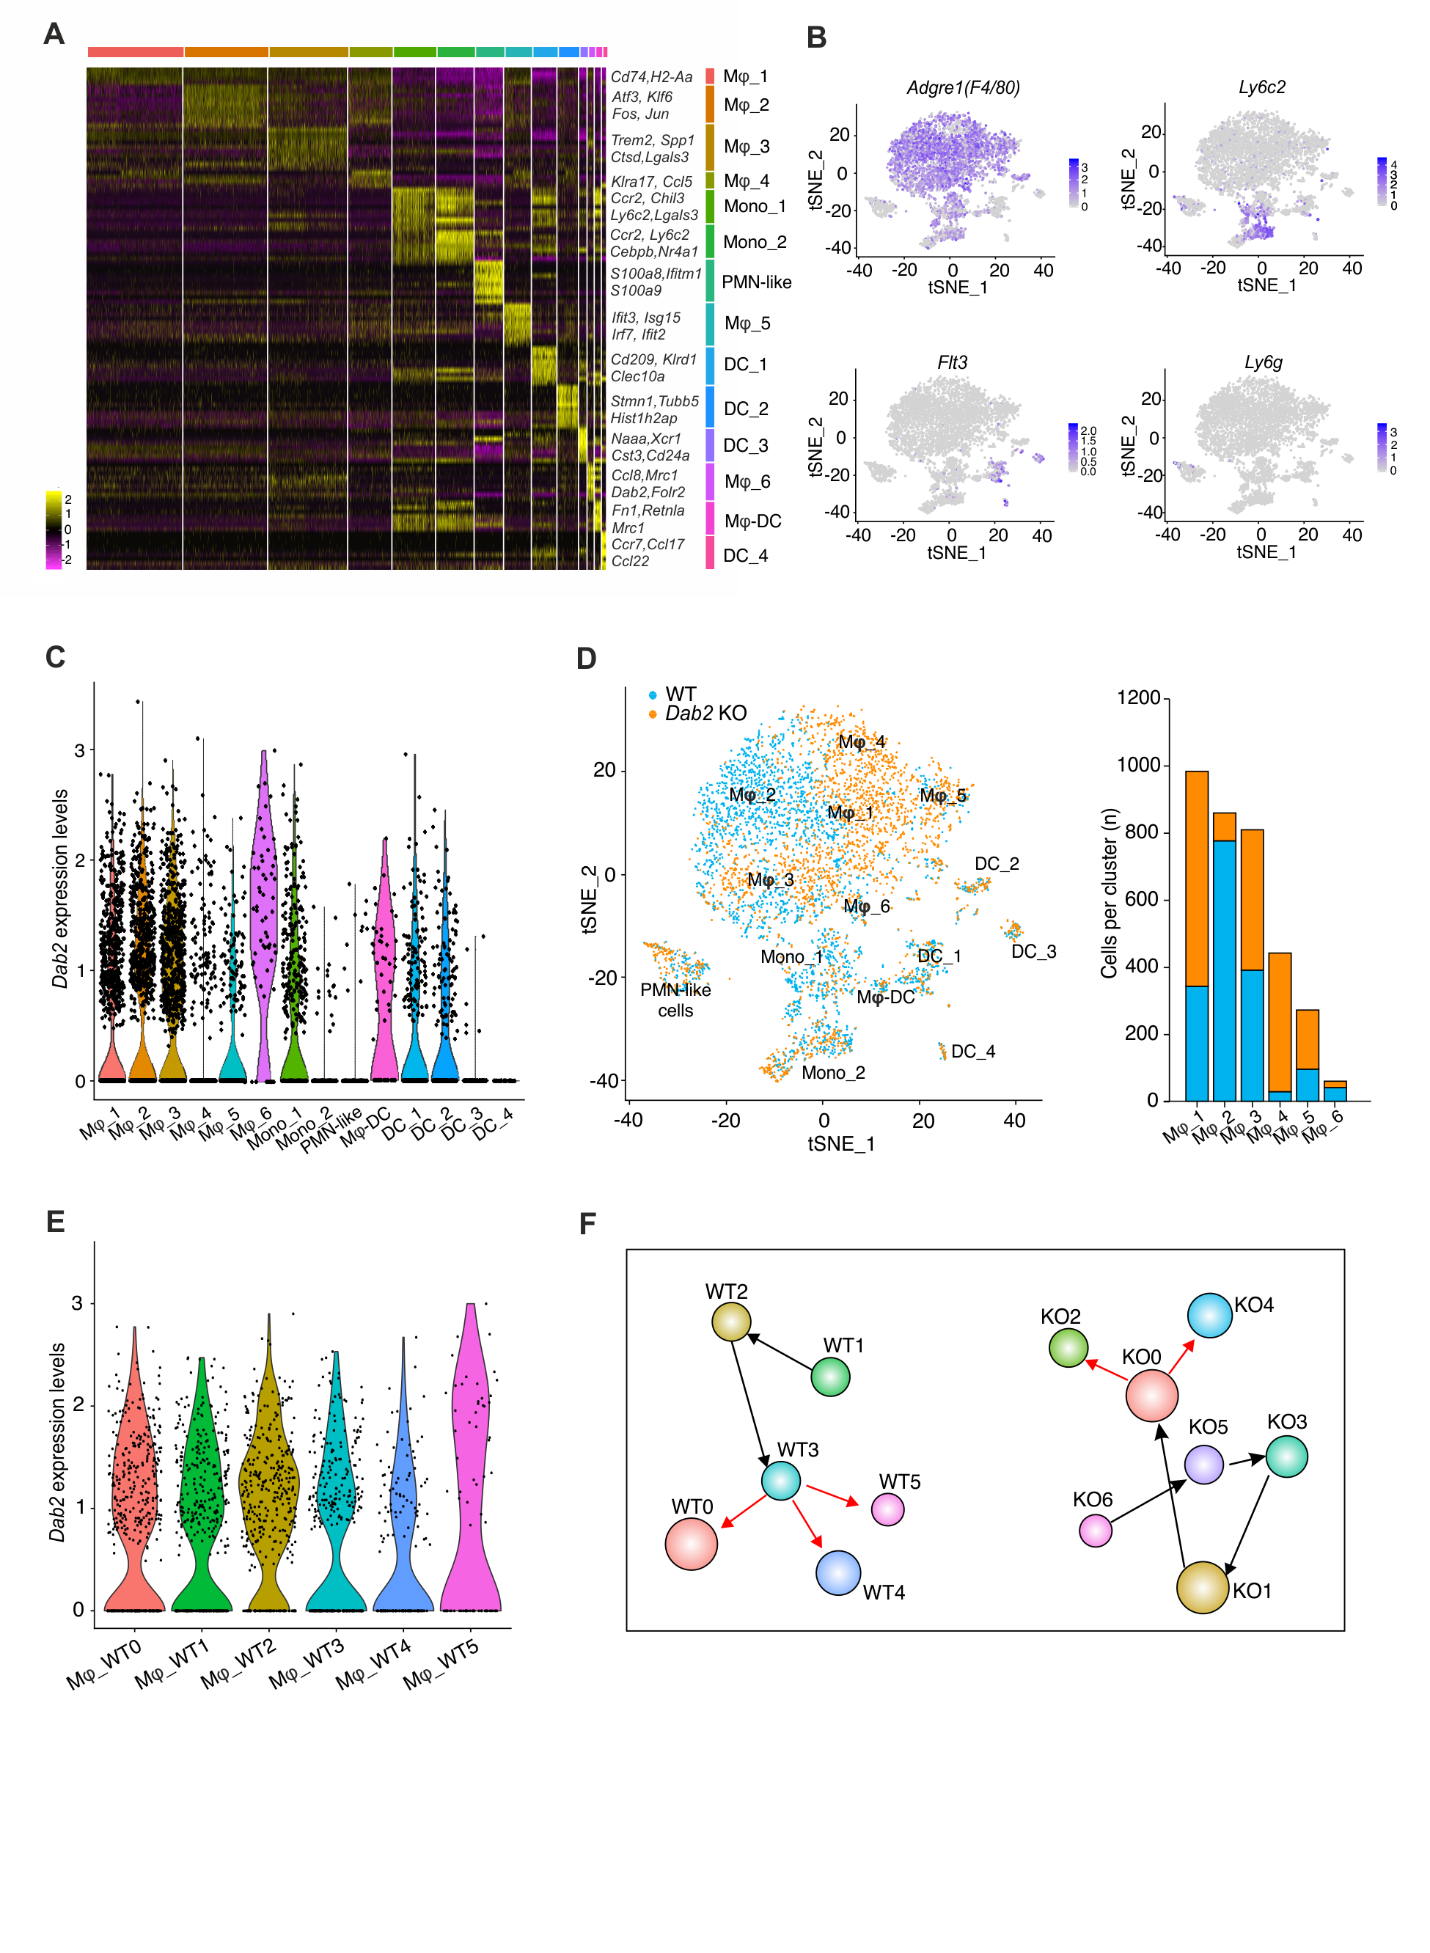
**

**Supplementary Fig. S1. Analysis of tumor-infiltrating myeloid cells by scRNAseq.**

**A,** Heat map reports scaled expression of the 10 most upregulated genes in each cluster defined in Fig. 1A. Selected enriched genes used for biological identification of each cluster are shown. Color scheme is based on z-score distribution from –2 (purple) to 2 (yellow). **B,** Feature plots displaying the expression of myeloid cells top markers (*Adgre1* for MΦs, *Ly6c2* for monocytes, *Flt3* for DCs, *Ly6g* for PMNs). **C,** Violin plot showing *Dab2* expression among different clusters. **D,** tSNE map of WT and *Dab2* KO myeloid cells (left) and number of cell per cluster of macrophages colored by condition (right). **E,** Violin plot showing *Dab2* expression levels in MΦ_WT clusters. **F,** Graphical representation of trajectory analysis of WT and *Dab2* KO macrophages performed by Slingshot.

**
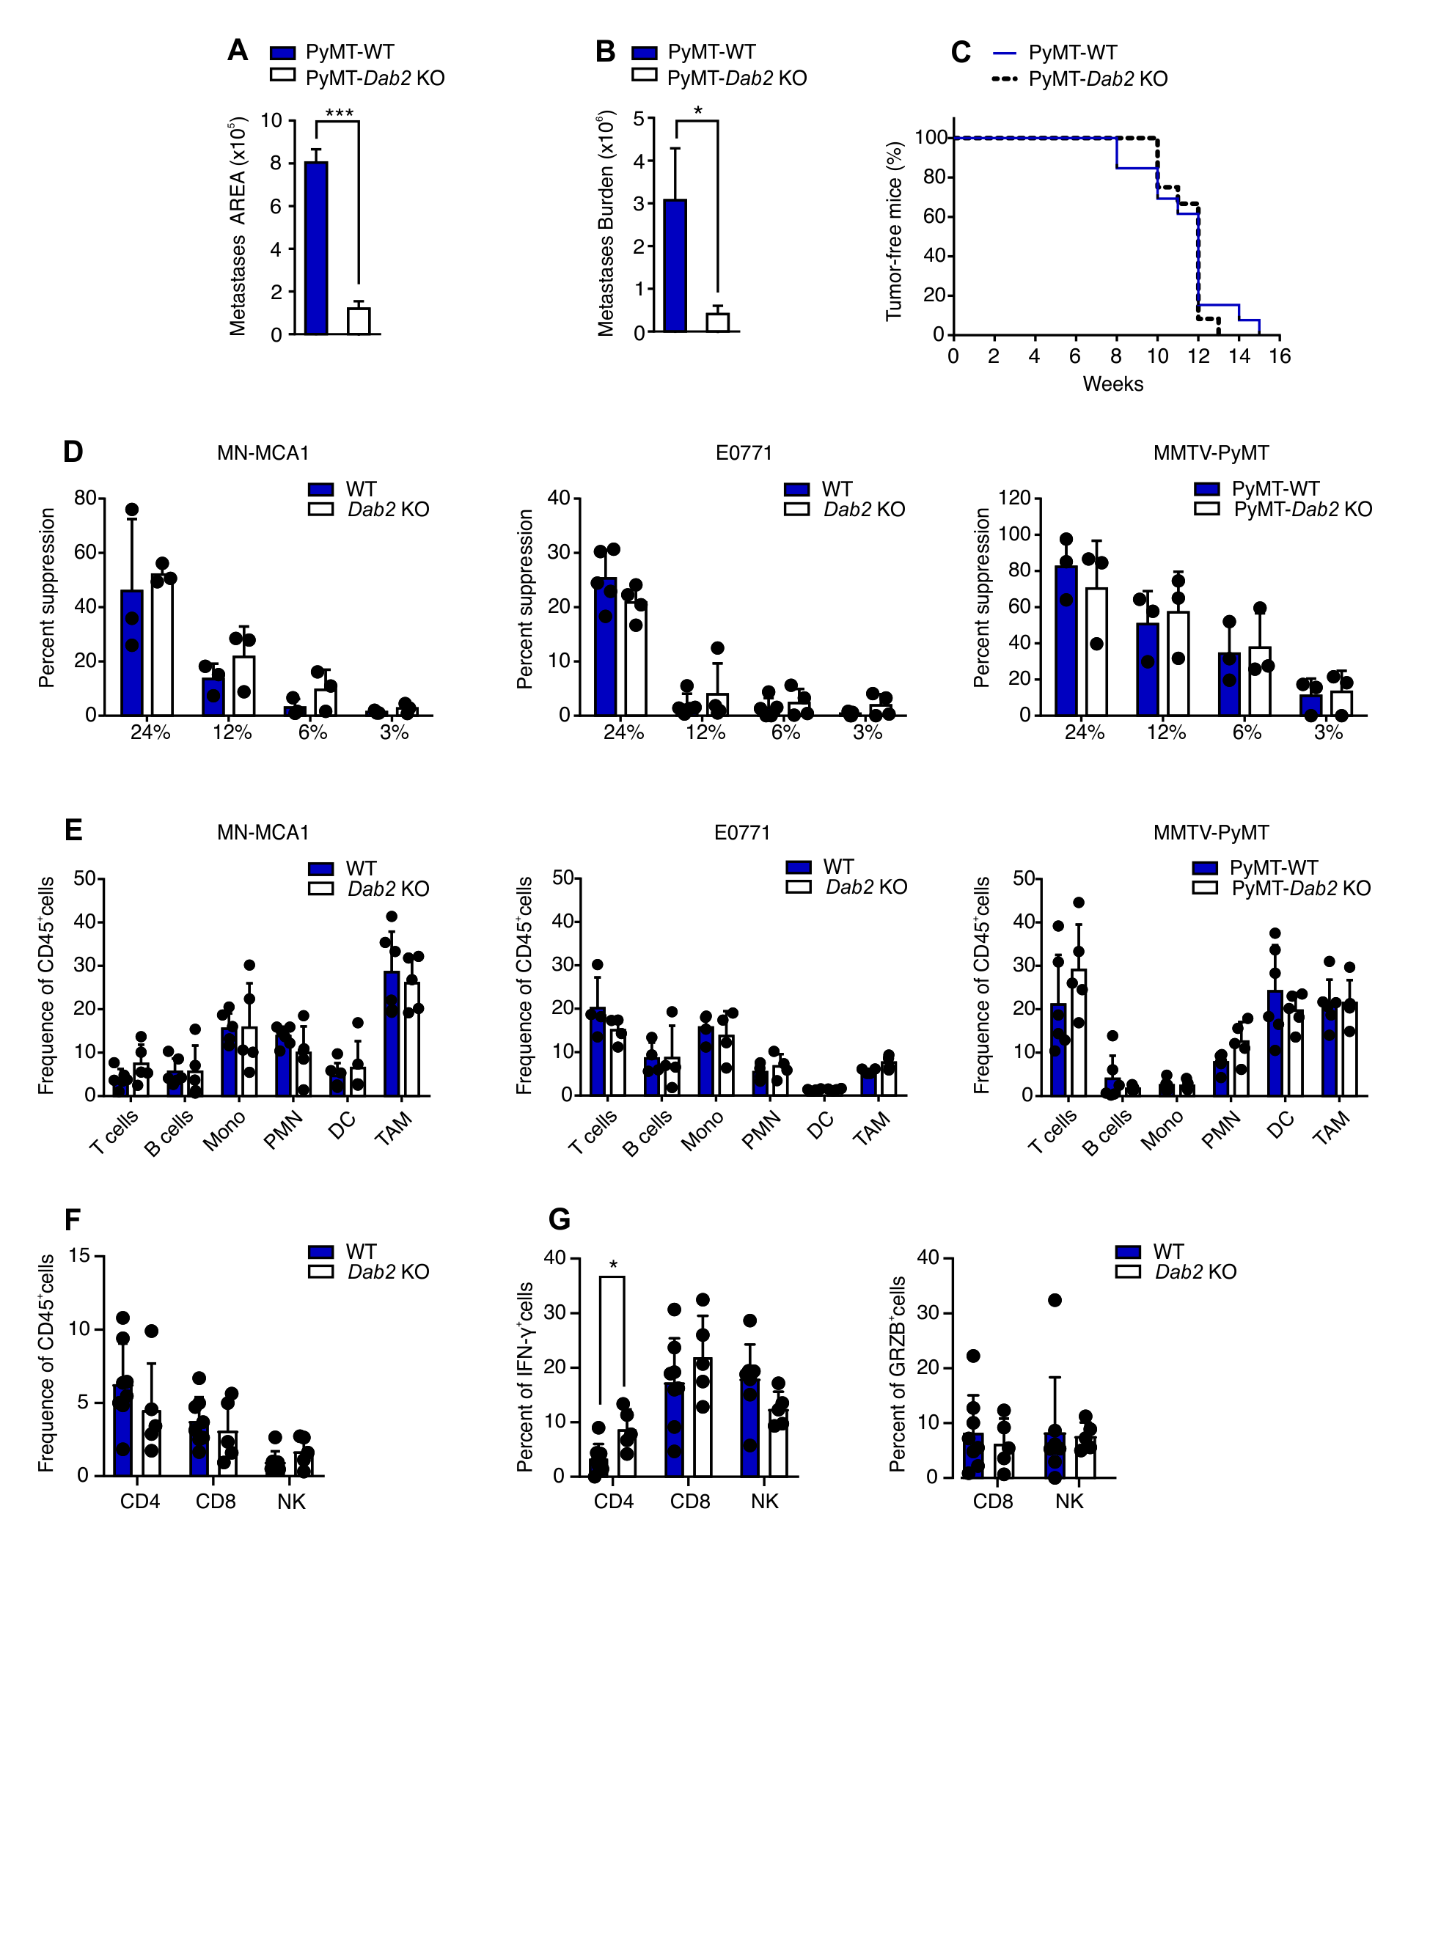
Supplementary Fig. S2. DAB2 deficiency does not affect immune cell recruitment or myeloid cell inhibitory function. A-C,** PyMT-WT and PyMT-*Dab2* KO mice are compared for lung metastasis area (A), burden (B) and tumor incidence (C) (log-rank p-value). (A,B) Data are presented as mean ± s.e. *p ≤ 0.05, **p ≤ 0.01 and ***p ≤ 0.001, Mann-Whitney test. **D,** Different percentages of tumor-infiltrating CD11b+ myeloid cells were tested for their ability to suppress the proliferation of OVA-specific, OT-I CD8+ T cells stimulated by the SIINFEKL peptide in culture (MN-MCA1, n=3 mice/group; E0771, WT n=5; *Dab2* KO n=4; PyMT, n=3 mice/group). **E,** Accumulation of different immune populations among CD45+-gated cells in MN-MCA1, E0771, and PyMT tumors from either WT or *Dab2* KO mice (MN-MCA1, WT n=6; *Dab2* KO n=5; E0771, n=4 mice/group; PyMT, WT n=6; *Dab2* KO n=5). **F**, Percentage of different lymphocytes within primary tumor of MN-MCA1 tumor-bearing mice (WT, n=8; *Dab2* KO, n=5). **G**, T and NK cell response in MN-MCA1 tumors from WT (n=8) or *Dab2* KO mice (n=5) upon stimulation with PMA (50 ng/mL) and ionomycin (1 µg/ml) represented as percent of either IFN-γ+ (left) or GRZB+ (right) cells. (D-G) Data are reported as mean ± s.d. *p ≤ 0.05, **p ≤ 0.01 and ***p ≤ 0.001 by Student’s test.


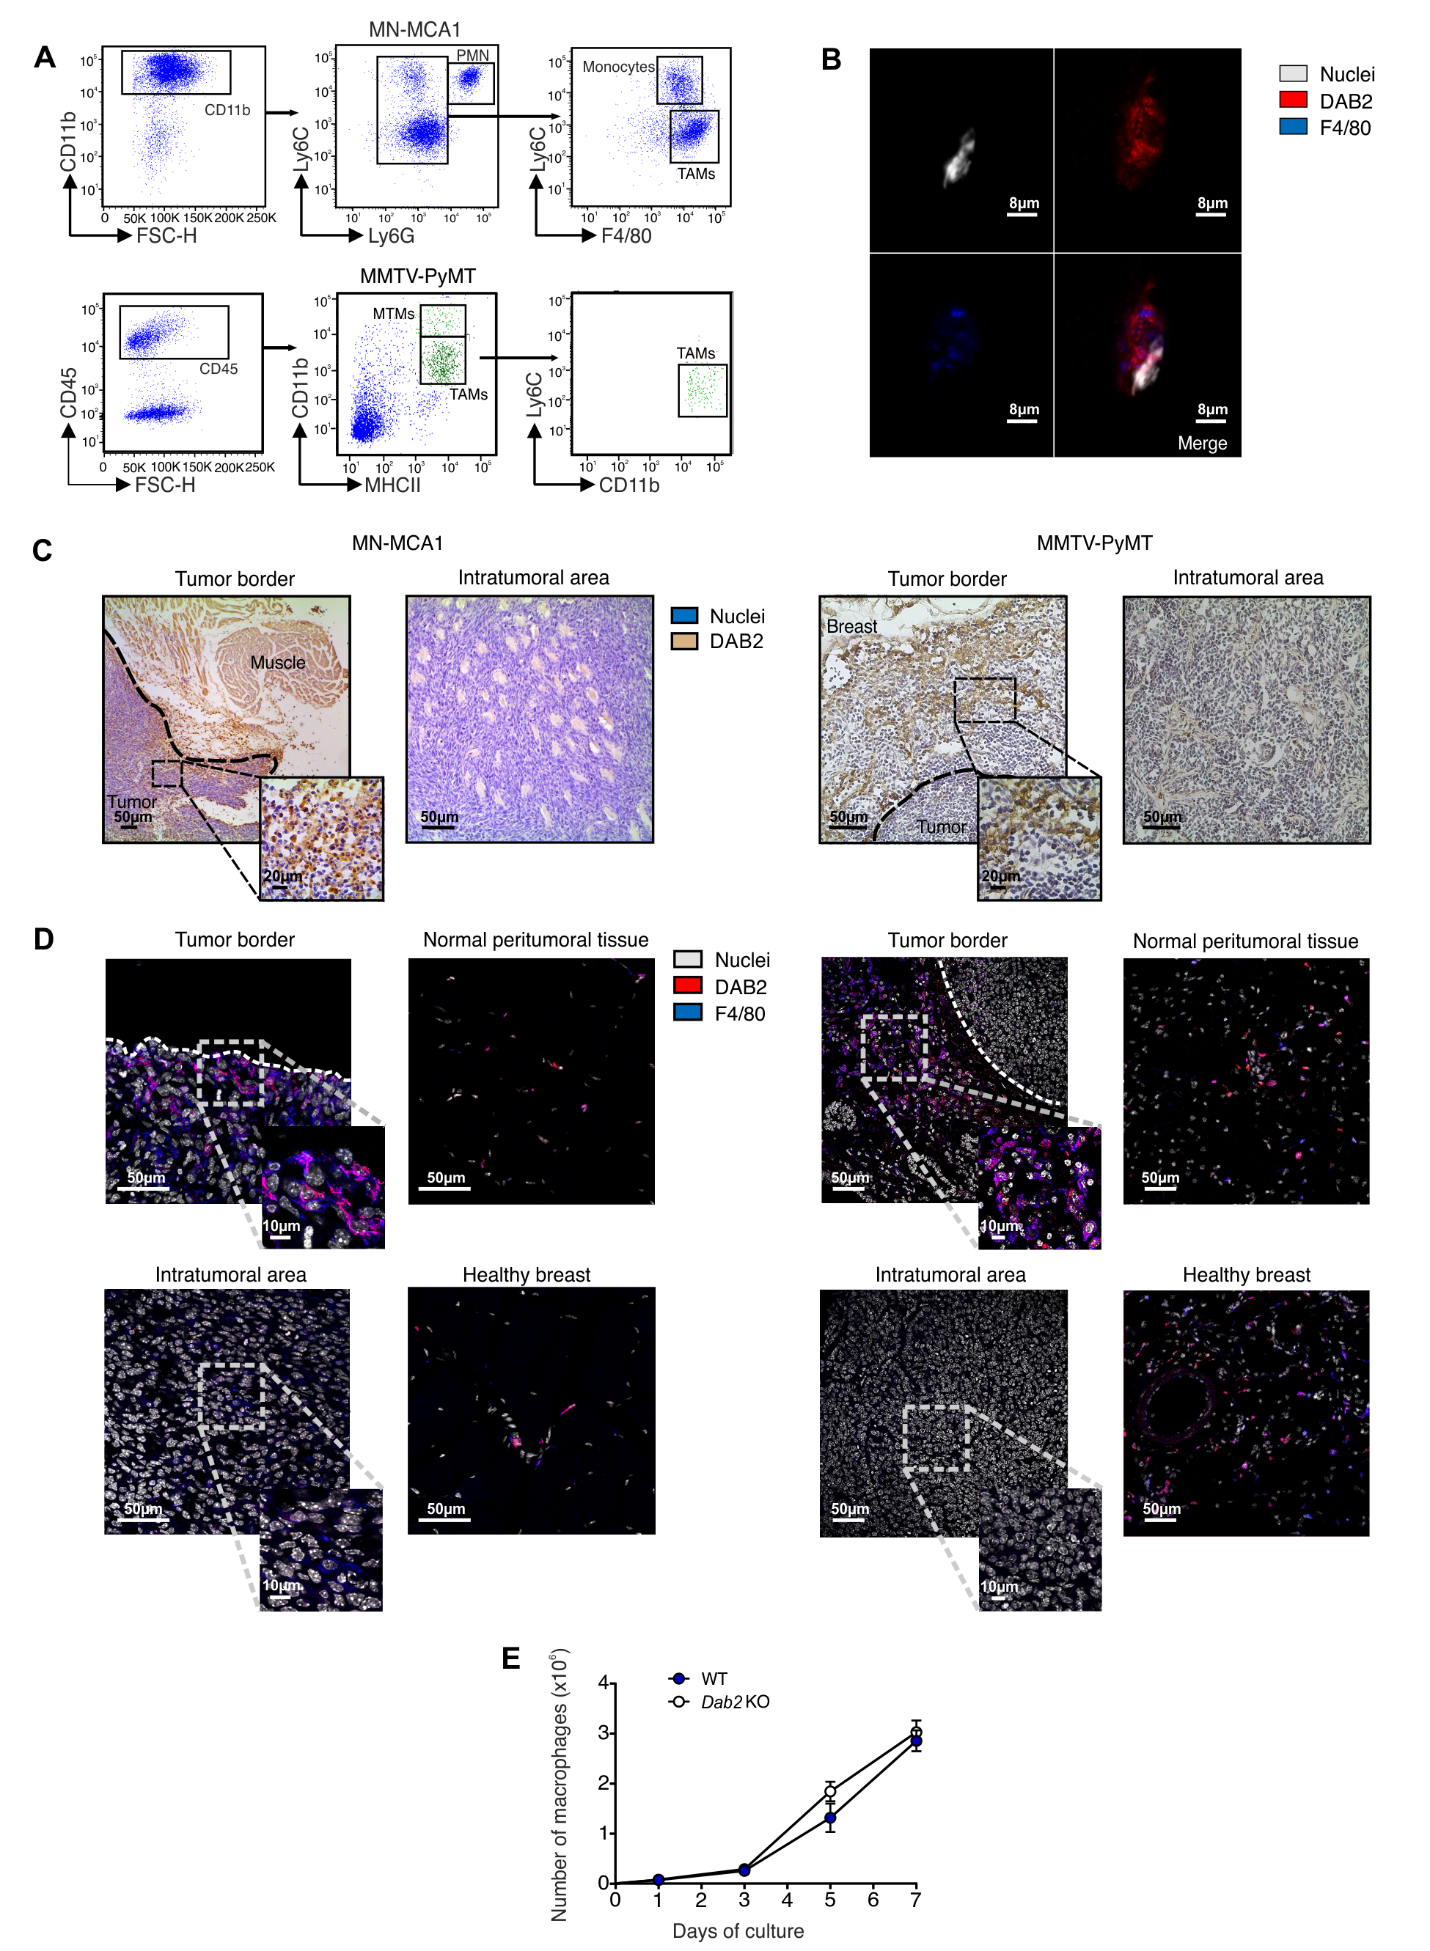


**Supplementary Fig. S3. DAB2 protein is expressed by TAMs and induced during macrophage differentiation.**

**A,** Gating strategies for FACS isolation of myeloid subsets from tumors of MN-MCA1–injected mice (upper panel) or primary tumors of PyMT mice (lower panel). **B,** TAMs, FACS-sorted from MN-MCA1 tumors, were analyzed by IF for DAB2 and F4/80 expression. DAPI was used as nuclei marker. Scale bar: 8 µm. **C-D,** Slices of primary tumors from MN-MCA1 tumor-bearing mice (left) or PyMT mice (right) were analyzed by IHC and IF. Scale bar: 50 µm. (C) Representative IHC images for DAB2 staining along the tumor borders (dashed lines) and within the tumor areas. Magnifications of tumor borders are reported. Scale bar: 20 µm. (D) Representative IF images from different areas of the tumor and from healthy tissue. Magnifications of tumor borders and intra-tumoral area are reported. Scale bar: 10 µm. **E,** BM precursors from WT and *Dab2* KO mice were cultured with CSF-1 for 7 days. The number of macrophages obtained during the culture is reported. Values were calculated by multiplying the count of retrieved cells by the percentage of macrophages, as assessed by flow cytometry. Data reported as mean ± s.e.; *p ≤ 0.05, **p ≤ 0.01 and ***p ≤ 0.001 by RM ANOVA. n=3 independent experiments, each obtained using a pool of 3 mice.


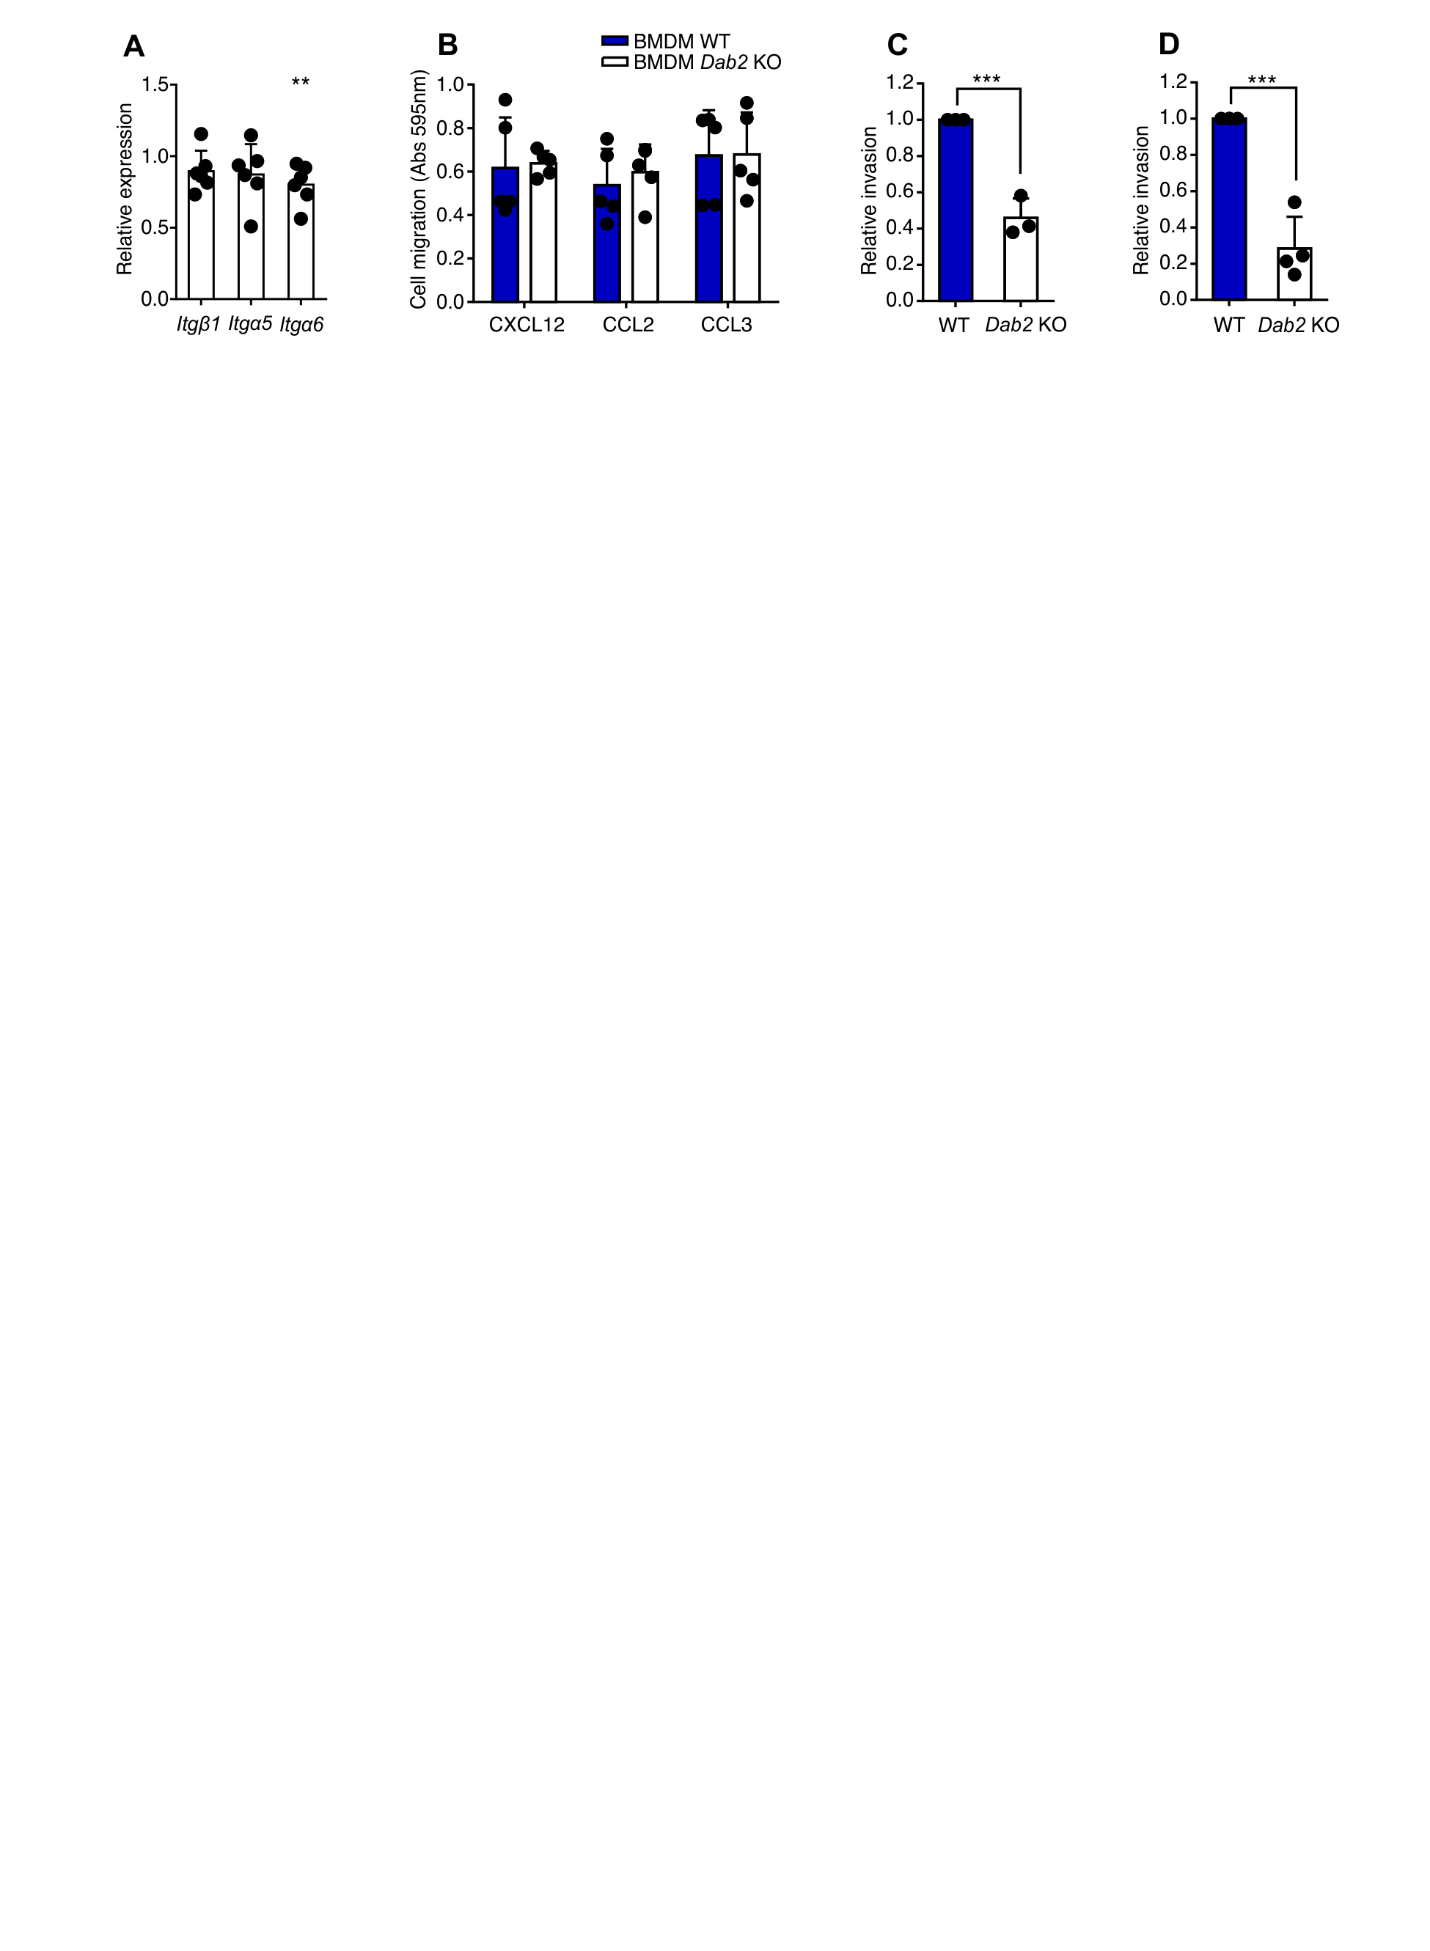


**Supplementary Fig. S4. DAB2 does not play a role in macrophage chemotaxis.**

**A,** *Itgβ1*, *Itgα5,* *Itgα6* expression assessed by qRT-PCR on BMDMs (n=3 independent experiments). Results are reported as fold change over WT samples. **B,** Chemotaxis assay of BMDMs, either WT or *Dab2* KO, carried out in Boyden chambers. CXCL12 (100 ng/mL), CCL2 (100 ng/mL) and CCL3 (100 ng/mL) were added in the lower compartment. Cell migration was evaluated by measuring the absorbance at 595 nm of invasive cells stained with crystal violet (n=5 independent experiments). **C,** Transwell invasion assay of BMDMs from WT or *Dab2* KO mice. The macrophages ability to remodel the matrix was evaluated measuring the absorbance at 595 nm of invasive cells stained with crystal violet and reported as fold change over WT cells (n=3 independent experiments). **D,** Transwell invasion assay with matrigel mixed with either WT or *Dab2* KO BMDMs. After 3 days of culture, macrophages were killed with puromycin and E0771 tumor cells were added on the top of the matrigel to monitor their movements through the pre-digested matrix. Cancer cells invasion was evaluated measuring the absorbance at 595 nm of crystal violet-stained cells and reported as fold change over WT+E0771 cells (n=4 independent experiments). (A-D) Data are presented as mean ± s.d. *p ≤ 0.05, **p ≤ 0.01 and ***p ≤ 0.001 by Student’s *t*-test.

**
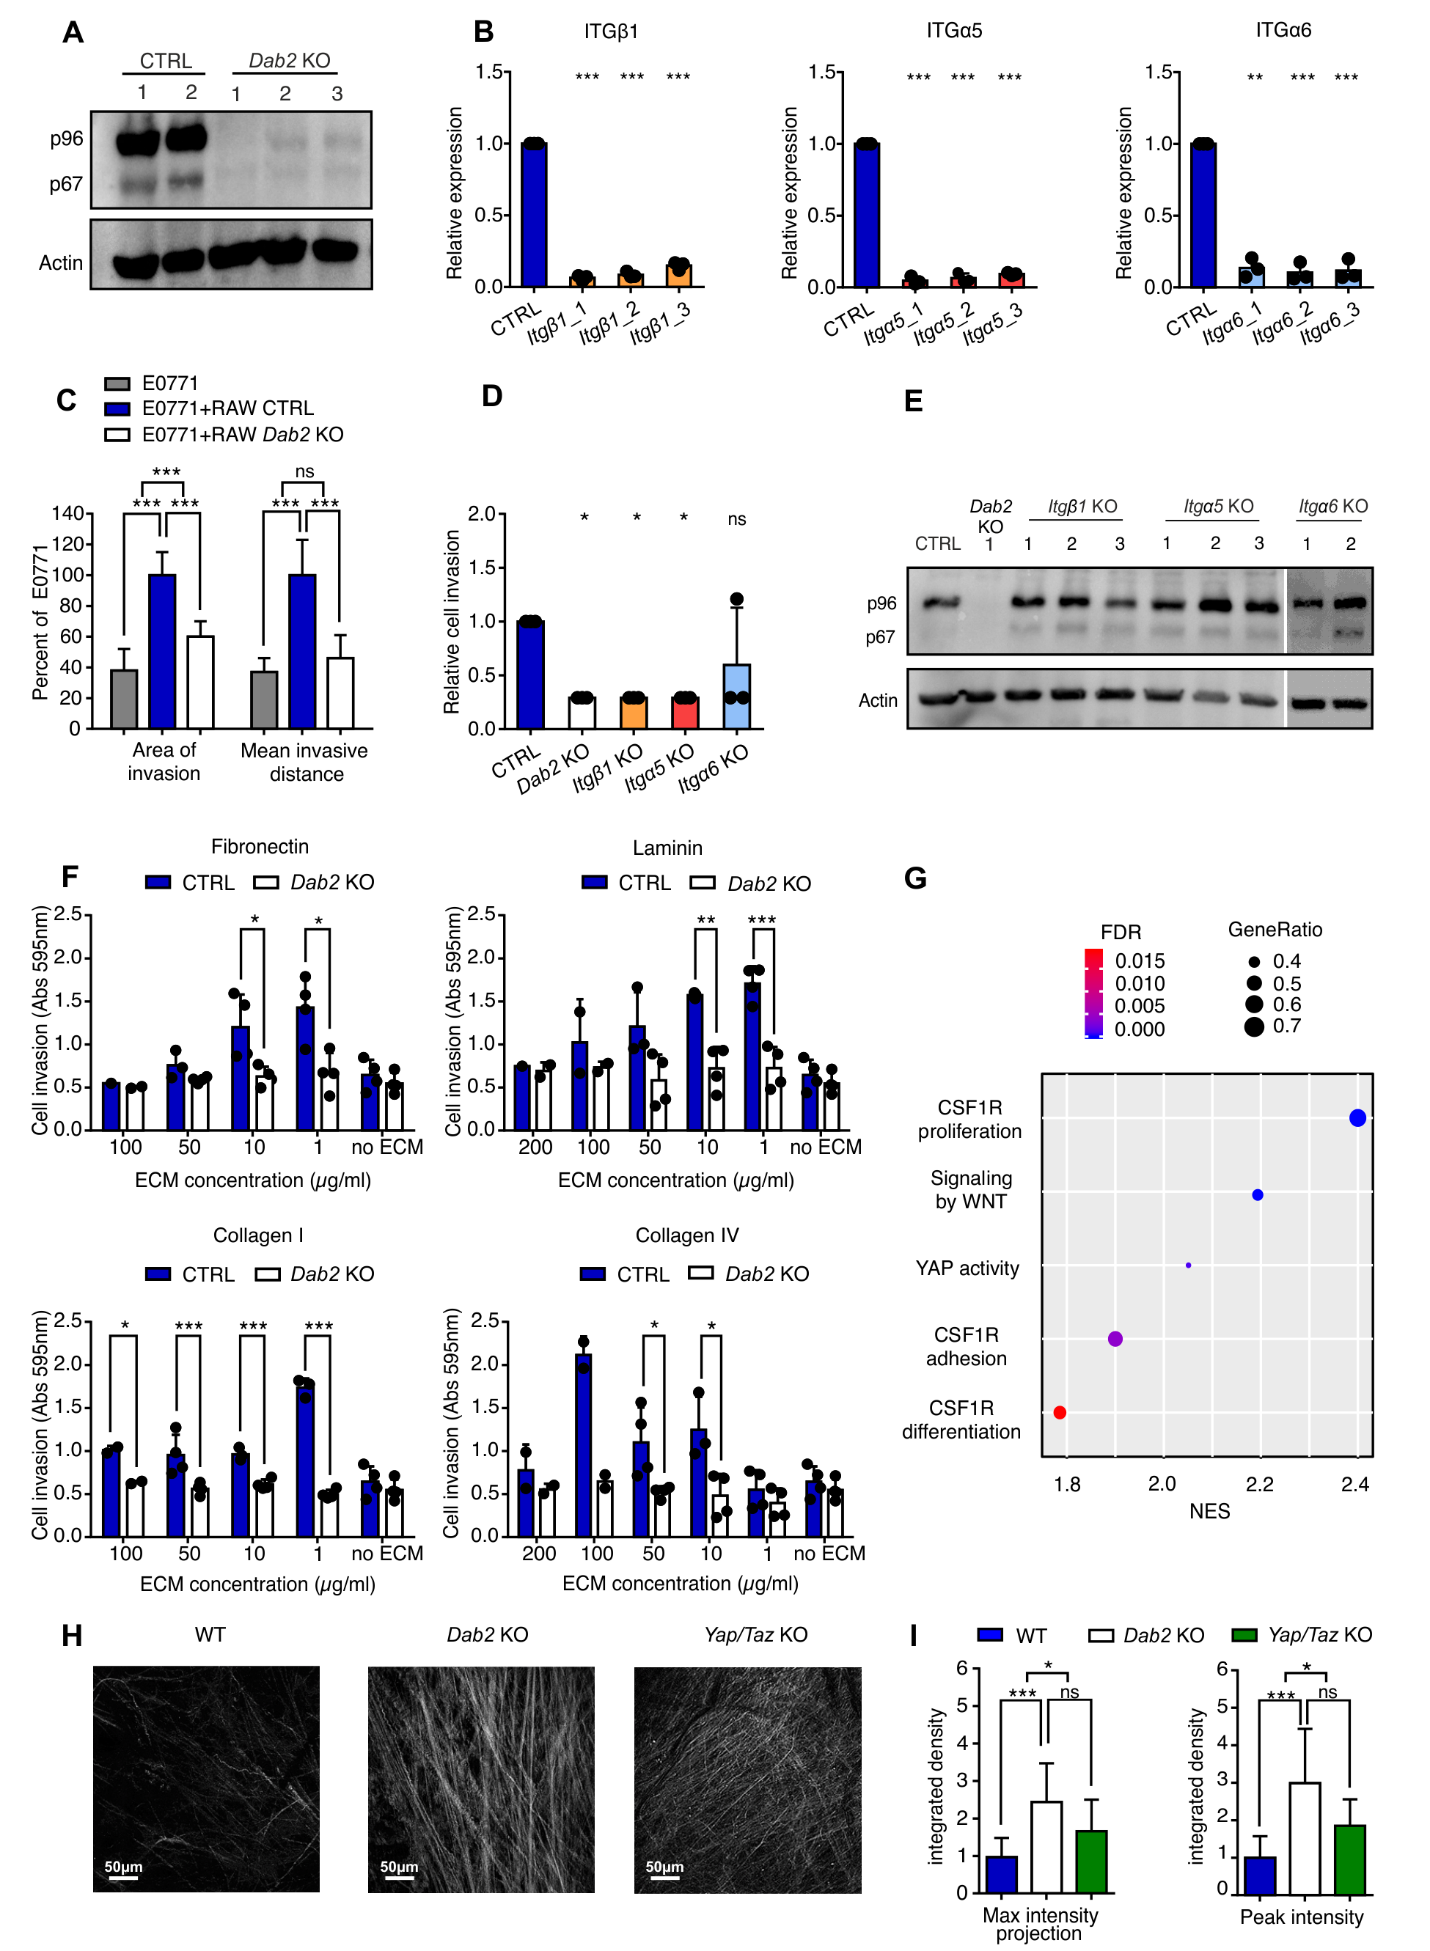
**

**Supplementary Fig. S5. DAB2 mediates integrin recycling and ECM remodeling favoring tumor cell invasiveness.**

**A,** WB for DAB2 expression in RAW 264.7, CTRL or *Dab2*-depleted clones. Actin was used as loading control. **B,** RAW 264.7 *Itgβ1* (orange bars), *Itgα5* (pink bars), *Itgα6*-depleted clones (light-blue bars) and CTRL (blue bar) were analyzed by flow cytometry for the surface exposure of β1, α5 and α6 subunits respectively. The fold change of MFI relative to the control is reported for each integrin (n=3 independent experiments). **C,** Inverted *in vitro* invasion assays of RAW 264.7 CTRL or *Dab2* KO single-cell-derived clones co-cultured with E0771 tumor cells in a matrigel layer. The area of invasion and the mean invasive distance for E0771 cells were quantified by confocal microscope (n=3 independent experiments). **D,** Integrins role in the matrix remodeling process mediated by RAW 264.7 cells was evaluated on Boyden chambers coated with matrigel. The invasive ability of different clones was assessed measuring the absorbance at 595 nm of invasive cells stained with crystal violet and reported as fold change over RAW 264.7 CTRL cells. Data are representative of 3 independent experiments. **E,** WB analysis for DAB2 expression isoforms (p96 and p67) in RAW 264.7, CTRL or *Dab2*, *Itgβ1*, *Itgα5* and *Itgα6*-depleted clones. Actin was used as loading control. **F,** Transwell invasion assay of RAW 264.7 CTRL and *Dab2* KO clones using a synthetic matrix (Puramatrix) supplemented with fibronectin (100-1 μg/ml), laminin (200-1 μg/ml), collagen I (100-1 μg/ml) and collagen IV (200-1 μg/ml). Cell invasion was evaluated measuring the absorbance at 595 nm of crystal violet stained cells (n=2 independent experiments). **G,** Gene set enrichment analysis (GSEA) for tumor-related pathways associated with *Dab2* expression in macrophages. **H,** Representative SHG images of collagen fibril density in MN-MCA1 WT, *Dab2* KO and *Yap/Taz* KO tumors. Scale bar: 50 µm **I,** Maximum projection intensity through 0–80 μm z-stack of SGH signal intensity and peak intensity within MN-MCA1 (WT n=9, *Dab2* KO n=8, *Yap/Taz* KO n=4) tumors. Data are reported as mean ± s.d., *p ≤ 0.05, **p ≤ 0.01 and ***p ≤ 0.001 by Student’s *t*-test (B,D,F) and one-way ANOVA (C,I).


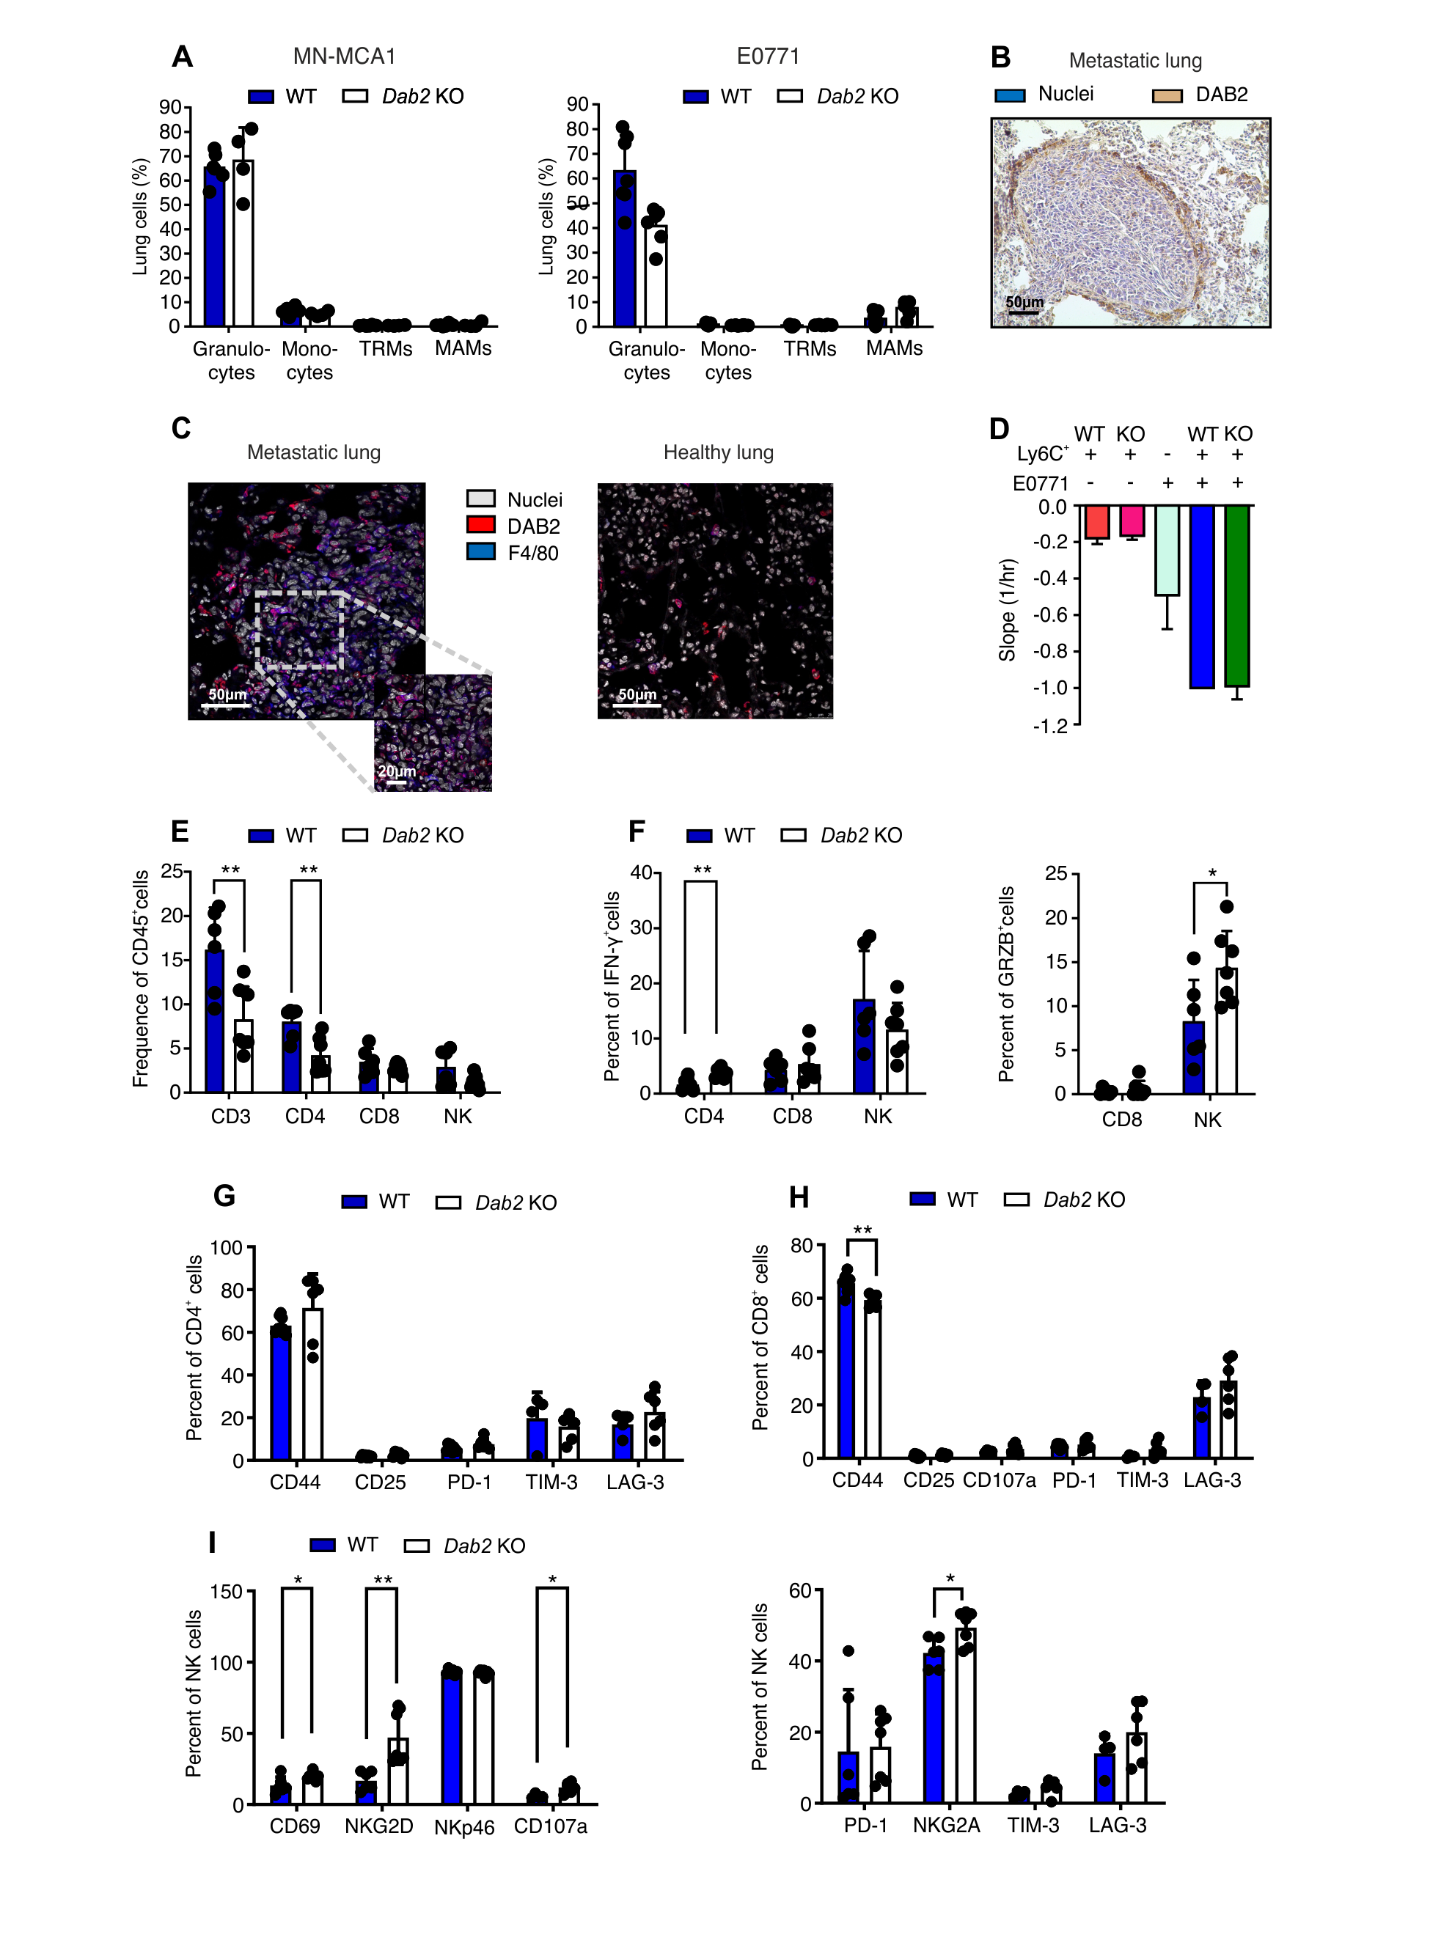


**Supplementary Fig. S6. DAB2+ macrophages are localized along metastasis border.**

**A,** Percentage of different myeloid subpopulations within metastatic lungs on MN-MCA1(WT, n=6; *Dab2* KO, n=4) or E0771 tumor-bearing mice (WT, n=7; *Dab2* KO, n=6). **B,** Lungs from MN-MCA1 tumor-bearing animals were stained for DAB2 by IHC; a representative image of metastasis is shown. Scale bar: 50 µm **C,** Exemplificative IF images of DAB2 and F4/80 double staining in the metastasis border (left) and in the healthy lung (right), are shown. Scale bars: 50 µm. Magnification of metastatic lung is reported. Scale bar: 20 µm. **D,** Trans-endothelial migration of Ly6C+ monocytes, alone or in co-culture with E0771 tumor cells, evaluated using the xCELLiegence technology. Microelectrodes detect impedance changes that are proportional to the number of transmigrated cells. The cell invasion was assessed by slope analysis of the generated curves and reported as inverted histograms. Data represent mean ± s.d.; n=2 independent experiments. **E**, Percentage of different lymphocytes within lungs of MN-MCA1 tumor-bearing mice (WT, n=7; *Dab2* KO, n=7). **F**, Lymphocyte response in MN-MCA1 lungs from WT (n=7) or *Dab2* KO mice (n=7) upon stimulation with PMA (50 ng/mL) and ionomycin (1µg/ml) is evaluated and represented as percent of either IFN-γ+ (left) or GRZB+ (right) cells. **G-I**, Analysis of CD4+ T cell (G), CD8+ T cell (H) and NK cell (I) activation and inhibition markers in lungs of MN-MCA1-bearing mice, WT or *Dab2* KO (A, D-I) Data are reported as mean ± s.d. *p ≤ 0.05, **p ≤ 0.01 and ***p ≤ 0.001 by Student’s test.

**
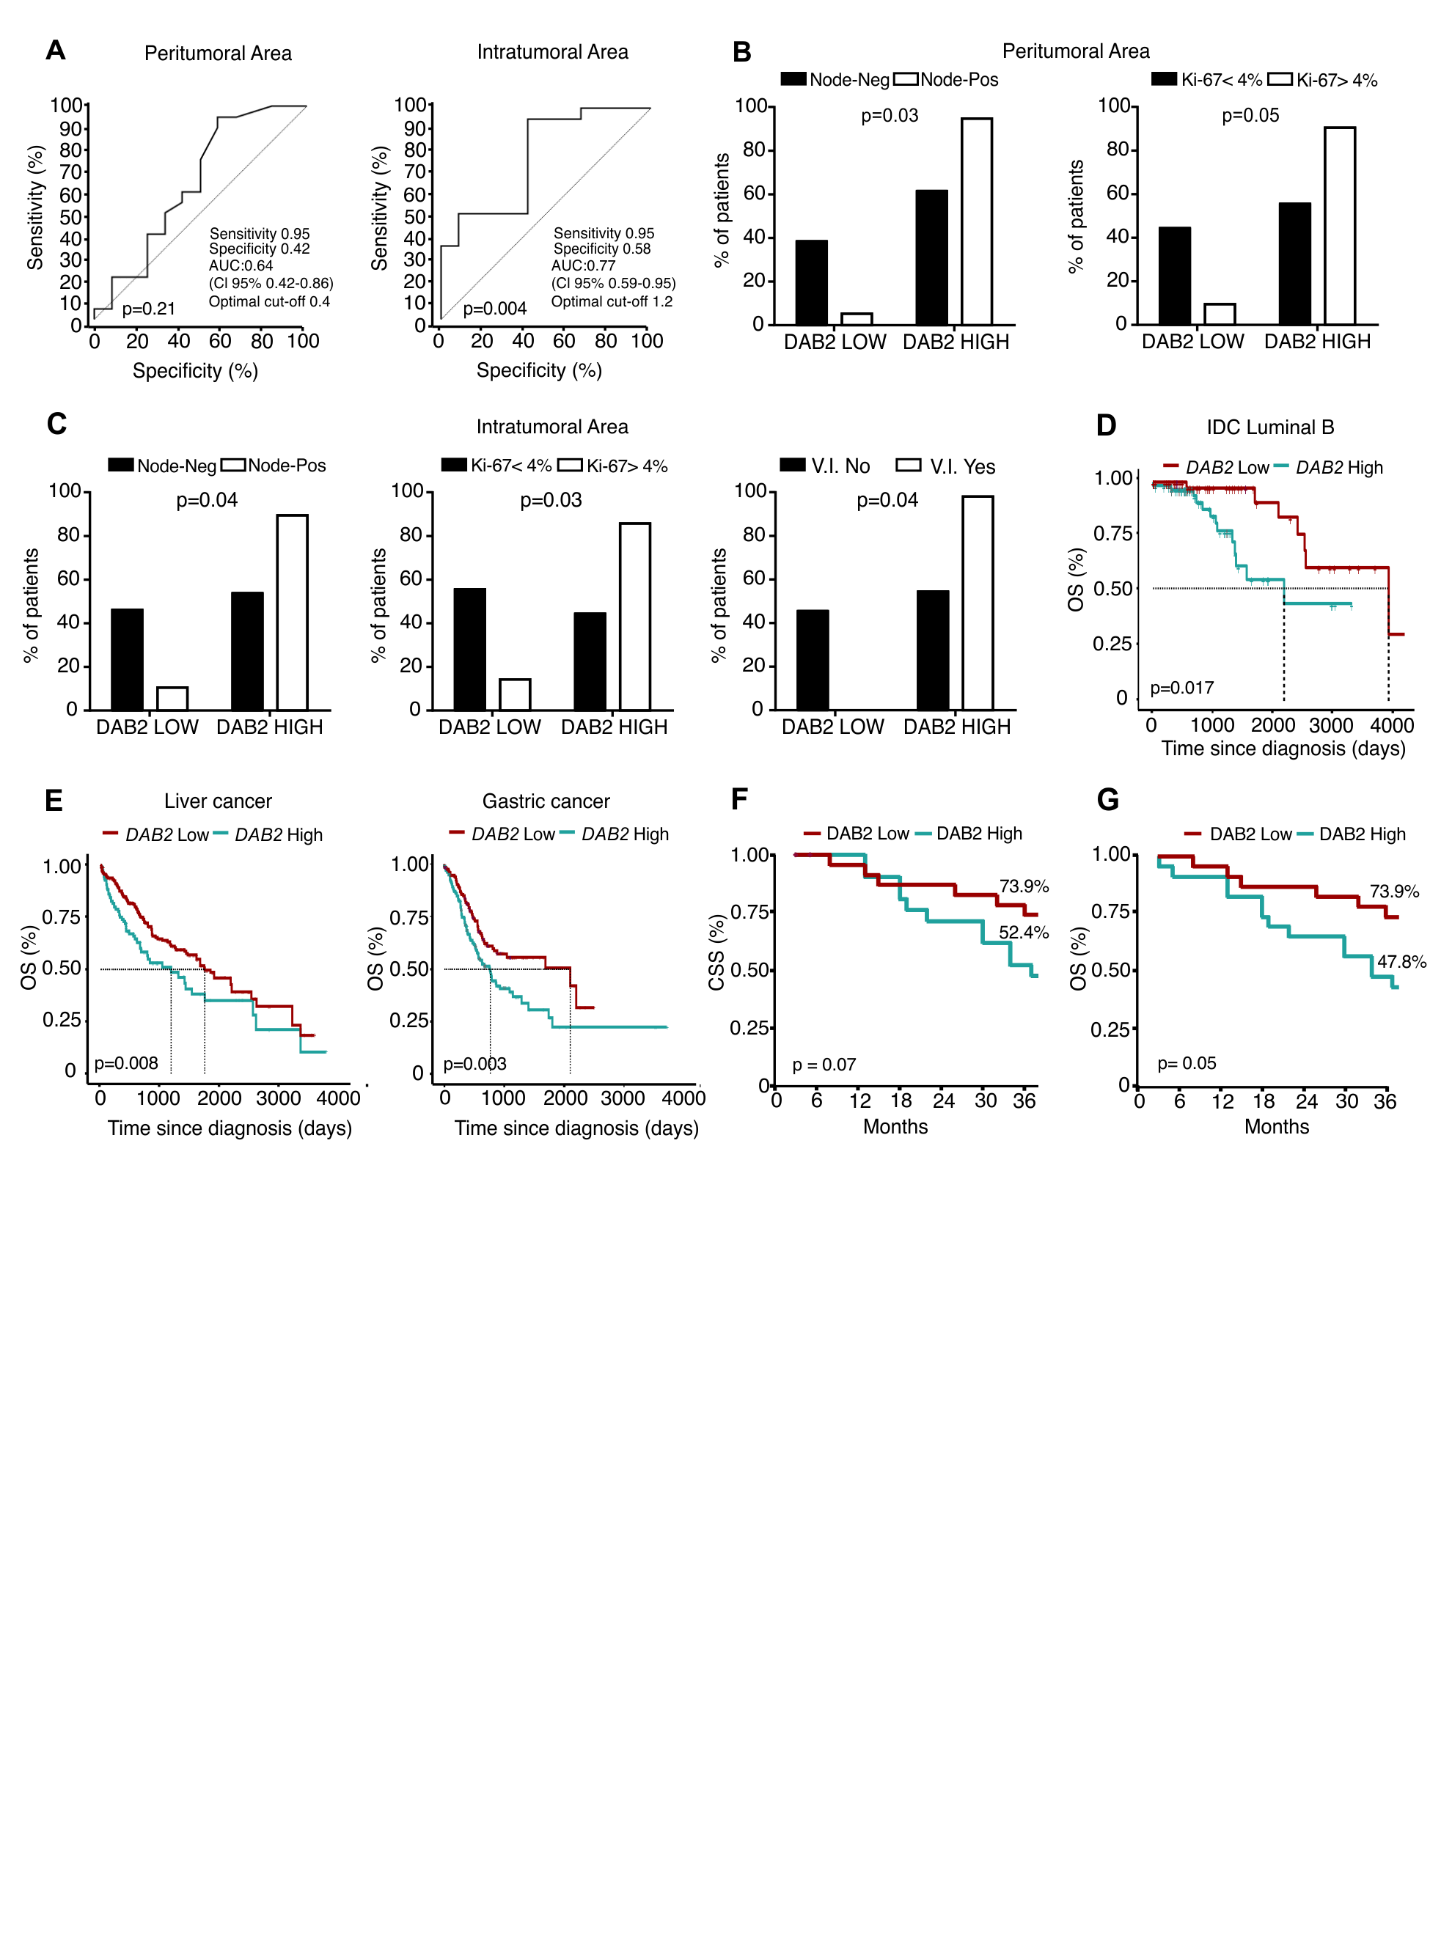
**

**Supplementary Fig. S7. Prognosis and correlation of DAB2+ TAMs with clinical and pathological data in cancer patients.**

**A,** Optimal cut-offs (ROC-analysis) of DAB2 expression in peri-tumoral and intra-tumoral infiltrates according to disease-free survival (DFS). The sensitivity (probability to detect true positives among the considered subjects) and the specificity (probability to identify true negatives) are indicated. AUC (area under the curve) > 0.6. **B-C,** Associations between peri-tumoral and intra-tumoral DAB2 expression and clinico-pathological characteristics (lymph node metastases, tumor cell proliferation [Ki67 expression], and vascular invasion) in ILC patients (Pearson’s chi-squared test or Fisher’s exact test, depending on sample size). **D,** Overall survival (OS) according to *DAB2* expression (RNA, low versus high) in IDC luminal B (F) breast cancers analyzed in TCGA database (log-rank p-values). **E,** OS according to *DAB2* expression (RNA, low versus high) in liver and gastric cancer in TCGA database (log-rank p-value). **F-G,** Cancer-Specific- and Overall-Survival (CSS low n=27 vs high n=23, OS low n=28 vs n=26) according to DAB2 expression in 59 samples from gastric cancer patients (log-rank p-value)

**Supplementary Tables**

**Table S1**. CRISPR-Cas9 single-cell derived clones screened by genetic analysis (Sanger

sequencing)

|  | **Forward sequence** | **Reverse sequence** | **Function** |
| --- | --- | --- | --- |
| *Dab2* KO_1 | Deletion 1bp at 63bp | Deletion 1bp at 61bp | Stop at 144 bp (48aa) |
| *Dab2* KO_2 | Insertion 1bp at 61bp | Insertion 1bp at 61bp | Stop at 96bp (32aa) |
| *Dab2* KO_3 | Deletion 2bp at 73bp | Deletion 2bp at 73bp | Stop at 96 bp (32aa) |
| *Itg*β*1* KO_1 | Deletion 2bp at 99bp (frameshift) | Deletion 2bp at 99bp (frameshift) | Stop at 192bp (63aa) |
| *Itg*β*1* KO_2 | Deletion 2bp at 98bp (frameshift) | Deletion2bp at 98bp (frameshift) | Stop at 192bp (63aa) |
| *Itg*β*1* KO_3 | Deletion 2bp at 99bp | Deletion 2bp at 99bp | Stop at 192bp (63aa) |
| *Itg*α*5* KO_1 | Deletion 8bp at 142bp | Deletion 8bp at 142bp | Stop at 258bp (86aa) |
| *Itg*α*5* KO_2 | Deletion 2bp at 145bp | Deletion 2bp at 145bp | Stop at 258bp (86aa) |
| *Itg*α*5* KO_3 | Deletion 2bp at 145bp | Deletion 2bp at 145bp | Stop at 258bp (86aa) |
| *Itg*α*6* KO_1 | Deletion 2bp at 272bp | Deletion 2bp at 272bp | Stop at 294bp (98aa) |
| *Itg*α*6* KO_2 | Insertion 2bp at 273bp | Insertion 2bp at 273bp | Stop at 387bp (129aa) |
| *Itg*α*6* KO_3 | Deletion 1bp at 107bp | Deletion 1bp at 107bp | Stop at 387bp (129aa) |

**Table S2.** Clinico-pathological characteristics of invasive lobular breast cancer patients.

| **Clinical-pathological characteristics** | **Subcategories** | **Number of Patients (%)** |
| --- | --- | --- |
| **Menopausal status** | Premenopausal  Postmenopausal | 10 (31.2)  22 (68.8) |
| **Performance status (ECOG)** | 0  1  2 | 28 (87.5)  3 (9.4)  1 (3.1) |
| **Ki67** | ≤4%  >4%  Unknown | 9 (28.1)  21 (65.6)  2 (6.3) |
| **Grading** | 1  2  3  Unknown | 4 (12.5)  7 (21.8)  6 (18.8)  15 (46.9) |
| **Oestrogen Receptor status** | Positive  Negative  Unknown | 27 (84.3)  2 (6.3)  3 (9.4) |
| **Progesterone Receptor status** | Positive  Negative  Unknown | 22 (68.8)  3 (9.4)  7 (21.8) |
| **HER2 status** | Positive  Negative  Unknown | 3 (9.4)  15 (46.9)  14 (43.7) |
| **T category according to TNM [7° Edition]** | 1  2  3  4 | 11 (34.4)  18 (56.3)  2 (6.3)  1 (3.1) |
| **Lymph-nodal Status** | Positive  Negative | 13 (40.6)  19 (59.4) |
| **Vascular Invasion** | Present  Absent  Unknown | 9 (28.1)  11 (34.4)  12 (37.5) |
| **Multifocality** | Present  Absent | 6 (18.8)  26 (81.2) |
| **Type of Surgery** | Conservative  Mastectomy | 16 (50.0)  16 (50.0) |
| **Lymph-node Dissection** | Yes  No | 26 (81.2)  6 (18.8) |

**Table S3.** Clinico-pathological characteristics of luminal invasive lobular breast cancer patients.

| **Clinical-pathological characteristics** | **Subcategories** | **Number of Patients (%)** |
| --- | --- | --- |
| **Menopausal status** | Premenopausal  Postmenopausal | 5 (16.7)  25 (83.3) |
| **Performance status (ECOG)** | 0  1  2 | 25 (83.3)  4 (13.3)  1 (3.3) |
| **Grading** | 1  2  3  Unknown | 8 (26.6)  12 (40.0)  5 (16.7)  5 (16.7) |
| **HER2 status** | Positive  Negative | 6 (20.0)  24 (80.0) |
| **T category according to TNM [7° Edition]** | 1  2  3  4 | 13 (43.3)  14 (46.7)  2 (6.7)  1 (3.3) |
| **Lymph-nodal Status** | Positive  Negative | 14 (46.7)  16 (53.3) |
| **Vascular Invasion** | Present  Absent  Unknown | 9 (30.0)  18 (60.0)  3 (10.0) |
| **Multifocality** | Present  Absent | 6 (20.0)  24 (80.0) |
| **Type of Surgery** | Conservative  Mastectomy | 23 (76.7)  7 (23.3) |
| **Lymph-node Dissection** | Yes  No | 17 (56.7)  13 (43.3) |

**Table S4.** Clinico-pathological characteristics of gastric cancer patients.

| **Clinical-pathological characteristics** | **Subcategories** | **Number of Patients (%)** |
| --- | --- | --- |
| **Gender** | Male  Female | 18 (30.5)  41 (69.5) |
| **Grading** | 1  2  3  Unknown | 9 (15.3)  24 (40.7)  21 (35.5)  5 (8.5) |
| **T category according to TNM [7° Edition]** | 2  3  4a  4b | 9 (15.3)  18 (30.5)  28 (47.5)  4 (6.7) |
| **Node status according to TNM [7° Edition]** | 0  1  2  3a  3b | 18 (30.5)  11 (18.6)  15 (25.4)  9 (15.3)  6 (10.2) |
| **Site** | Antrum  Body  Fundus  Gastric stump | 22 (37.3)  15 (25.4)  20 (33.9)  2 (3.4) |
| **Type of Surgery** | Partial gastrectomy  Total gastrectomy  Gastroesophagectomy | 15 (25.4)  39 (66.1)  5 (8.5) |

**Supplementary Data S1.** Marker genes for each cell type identified in tumor-infiltrating myeloid cells (excel file).

**Supplementary Data S2.** Marker genes for macrophages clusters from WT and *Dab2* KO samples (excel file).

**Supplementary Data S3.** Description of the functional status of WT and *Dab2* KO macrophages (excel file).

**Supplementary Methods**

*In vitro BMDMs generation*

Tibias and femurs were removed in sterility from C57BL/6 and *Dab2* KO mice, and bone marrow cells were flushed. Red blood cells were lysed with a hypotonic solution containing 8.3% NH4Cl, 1% KHCO3 and 0.5M EDTA. To obtain differentiated macrophages, BM cells were cultured in RPMI 1640 (Euroclone, Milan, Italy) supplemented with 100ng/mL CSF-1 (Miltenyi Biotec, Bologna, Italy), 10% heat-inactivated FBS (Superior, Merck, Darmstadt, Germany), 2mM L-glutamine, 10mM HEPES, 1mM sodium pyruvate, 150U/mL streptomycin, 200U/mL penicillin/streptomycin (all from Euroclone, Milan, Italy). Cultures were maintained at 37°C in 5% CO2-humidified atmosphere for 7 days. On day 4 of culture, fresh cytokine-supplemented complete medium was added. To evaluate the number of macrophages during *in vitro* CSF-1–induced differentiation of BM precursors, every two days cells were harvested and counted. Final values were obtained multiplying the number of counted cells for the percentage of macrophages, as assessed by flow cytometry.

*Lung metastasis detection and quantification*

In already euthanized mice, lungs were flushed from blood by injecting PBS solution into the right ventricle. Organs were then harvested and fixed in 10% formaldehyde. To optimize the detection of microscopic metastases and ensure systematic uniform and random sampling, lungs were cut transversally into 2 mm-thick parallel slabs with a random position of the first cut in the first 2 mm of the lung, resulting in 5-8 slabs per lung. The slabs were then embedded and sections stained with hematoxylin and eosin (Bio-Optica, Milan, Italy). The number of lung micrometastases was blindly evaluated by two pathologists with a Leica DMRD optical microscope.

*Preparation of cell suspensions from organs*

Spleens, lungs and tumors were collected from sacrificed mice and processed as previously described (1). Spleens were mechanically disaggregated and filtered (Corning Inc, New York, USA). Tumors and lungs were cut in small pieces with scissors, enzymatically digested at 37°C for 1h with a solution containing collagenase IV (1mg/ml), hyaluronidase (0.1mg/ml) and DNase (4.5mg/ml) (Sigma-Aldrich, Saint Louis, MO, USA). Cells were then collected, filtered and red blood cells were lysed. Cell suspensions were used for immunomagnetic sorting, FACS or Western blot analysis.

*Organ cryoconservation and tissue sectioning*

Tumors and lungs were explanted and immediately fixed in 4% formaldehyde for 3h at 4°C. After fixation, organs were progressively dehydrated in 20% sucrose for 48h and, subsequently, in 30% sucrose for other 48h. Then, organs were included in cryostat embedding medium (Killik, Bio-Optica, Milan, Italy), frozen on liquid nitrogen vapours and stored at -80°C. Frozen organs were cut with a Leica CM 1950 cryostat in 7μm-thick slices, which were stored at -20°C until staining for immunofluorescence or immunohistochemistry.

*Immunofluorescence (IF)*

For IF on cell lines or tissue sections, respectively coverslips and slides were rehydrated, fixed in 4% formaldehyde and permeabilized with PBS+0.1% Triton X-100. Unspecific binding sites were blocked with either PBS+10% FBS or PBS+15% FBS+3% BSA+0.25% gelatin for more intense backgrounds to be reduced. Then, IF was carried out by incubation of Primary antibodies (Ab) over-night at 4°C followed by secondary Ab for 2h at RT, while nuclei were stained with DAPI (ThermoFisher Scientific, Waltham, MA, USA) for 10 minutes at RT. For the YAP-staining, tissue sections were permeabilized with PBS+0.3% Triton X-100 while both blocking and wash solutions were supplemented with 0.1% of Triton X-100 to enhance intra-cellular staining. Coverslips and slides were mounted by using Fluorescent Mounting Medium (DAKO) and analyzed with a Leica TCS SP5 confocal microscope and LAS AF software. The following primary Ab were used: rabbit anti-DAB2 H-110, mouse anti-YAP 63.7, rabbit anti-YAP H-125 (all from Santa Cruz Biotechnology), rabbit anti-YAP1 (Proteintech Europe, Manchester, UK), rat anti-F4/80, Cl:A3-1 (Bio-Rad laboratories, Hercules, CA, USA), mouse anti-CD68, KP1 (Abcam, Cambridge, UK). The secondary conjugated Ab were purchased from Jackson ImmunoResearch: anti-rabbit RRX, anti-rat Alexa Fluor 647, anti-mouse Alexa Fluor 488.

*Immunohistochemistry (IHC)*

For IHC on tissue sections from murine organs, slices were fixed as in IF and endogenous peroxidases were inactivated with PBS+0.3% FBS+0.3% H2O2. Permeabilization, blocking and incubation with primary Ab were performed as in IF. The subsequent steps were performed following Elite ABC Kit (Vectastain) protocol. Briefly, slices were incubated with the provided anti-rabbit biotinylated secondary Ab, incubated with the avidin-HRP (horse radish peroxidase) reagent, and stained with the DAB chromogen (Sigma-Aldrich, Saint Louis, MO, USA) until colour developed. Nuclei were stained with Mayer’s hematoxylin (Sigma-Aldrich, Saint Louis, MO, USA) and dehydrated in increasing concentrations of ethanol. Finally, slices were mounted with the Eukitt mounting medium (Bio-Optica) and observed with a Leica DMIL LED inverted optical microscope equipped with a Leica EC3 CCD camera. For histological evaluations on tissue sections from patients, paraffin was removed from slices with xylene and decreasing concentrations of ethanol. Antigens were unmasked by heating slices at sub-boiling temperature in 10mM citrate buffer (pH 6). The profiling for DAB2 was automatically performed on a Bond TM Polymer Refine Detection System (Leica). Then, sections were lightly counterstained with hematoxylin.

For prognosis and survival correlation analyses in patients, an average number of DAB2+ cells into the peritumoral and intratumoral infiltrates was obtained by analyzing 10 HPFs (40x). Positive endothelial and neoplastic cells were not retained for scoring. The immunohistochemical staining for DAB2 in gastric cancers was scored in the TMA scores and the number of positive cells with a macrophage-like morphology were counted in three separate 40x HPFs. Tumors were dichotomized as DAB2 low if the number of DAB2+ cells was <20 and DAB2 high when ≥20.

*Flow cytometry*

0.5-2x106 cells were washed in PBS and incubated with FcReceptor Blocking reagent CD16/32 (Biolegend, San Diego, CA, USA) to saturate FcR. The following mAbs were then used for cell labelling: anti-mouse CD11b (M1/70), Ly6C (HK1.4), Ly6G (1A8), B220 (RA3-6B2), CD3 (145-2C11), CD45 (A20), CD45.2 (104), I-A/I- E (M5/114.15.2), F4/80 (Cl:A3-1), CD11c (N418), CD8 (53-6.7), NK1.1 (PK136), CD25 (PC61.5), CD4 (GK1.5), PD-1 (29F.1A12), CD44 (IM7), CD69 (HI.2F3), NKG2D (CX5), NKp46 (29A1.4), CD107a (1D4B), NKG2A (16A11), LAG-3 (C9B7W), TIM-3 (B8.2C12) and Aqua LIVE/DEAD dye. For integrin exposure analysis, cells were detached with PBS-2mM EDTA, kept on ice, stained with Aqua LIVE/DEAD dye (ThermoFisher Scientific, Waltham, MA, USA) and fixed in 4% formaldehyde to prevent integrin recycling. The integrin staining was performed using anti-mouse CD29 (ITGβ1; clone HMb1-1), CD49a (ITGα1; clone Ha31/8), CD49e (ITGα5, clone 5H10-27) and CD49f (ITGα6; clone GoH3) antibodies. All the antibodies were purchased from the following companies: BD Bioscience (San Jose, CA, USA), eBiosciences (ThermoFisher Scientific, Waltham, MA, USA), Bio-rad Laboratories (Hercules, CA, USA) and Biolegend (San Diego, CA, USA). The MFI (mean fluorescence intensity) of integrins was used to calculate the fold change relative to WT BMDMs or RAW264.7 cells. Samples were acquired with FACS Canto II (BD, Franklin Lakes, NJ, USA) and analyzed with FlowJo software (Tree Star, Inc., Ashland, OR, USA).

*Immunomagnetic sorting*

Murine CD11b+ cells were isolated by immunomagnetic sorting (using CD11b Microbeads, Miltenyi Biotec, Bologna, Italy) according to manufacturer’s instructions and their purity was evaluated by flow cytometry. For all separations, the positive fraction was obtained with a purity of ≥ 95%.

*Ex-vivo lymphocyte stimulation*

To determine the intracellular levels of IFN-γ and GRZB, CD45+ cells were isolated from primary tumors and lungs of WT and *Dab2* KO MN-MCA1 tumor-bearing mice by immunomagnetic sorting (CD45 Microbeads, Miltenyi Biotec, Bologna, Italy). Cells were stimulated with PMA (50ng/mL, Sigma-Aldrich, Saint Louis, MO, USA) and ionomycin (1µg/ml, Sigma-Aldrich, Saint Louis, MO, USA) at 37°C for 4h, in the presence of a transport inhibitor to block cellular secretion (GolgiStop™; BD biosciences, San Jose, CA, USA). Unstimulated cells were used as negative controls for cytokine production. At the end of the stimulation, cells were incubated with FcReceptor Blocking reagent CD16/32 (Biolegend, San Diego, CA, USA) followed by the addition of anti-mouse CD45 (A20), CD3 (145-2C11), CD4 (GK1.5), CD8 (53-6.7), NK1.1 (PK136) antibodies and Aqua LIVE/DEAD dye (V450) for 30 min at 4°C. Thereafter, cells were fixed and permeabilized using Intracellular Fixation & Permeabilization reagent for 30 min at room temperature and washed with the Permeabilization buffer (both purchased from ThermoFisher Scientific, Waltham, MA, USA). For the intracellular staining, anti-mouse GRZB (NGZB) and anti-mouse IFN-γ (XMG1.2) antibodies were used. Samples were acquired with FACS Canto II (BD, Franklin Lakes, NJ, USA) and data were analyzed with FlowJo software (Tree Star, Inc., Ashland, OR, USA).

*Ex vivo T cell suppression assays*

The immunosuppressive activity of CD11b+ cells immunomagnetically sorted from MN-MCA1, E0771 and PyMT tumors growth in WT or *Dab2* KO mice was evaluated for their ability to suppress the proliferation of T cells as previously described (2).

ELISA

MN-MCA1 and E0771 tumor cell supernatants were tested for CSF-1 (Invitrogen, Thermo Fisher Scientific, Waltham, MA, USA) and CSF-2 production (eBioscience, Thermo Fisher Scientific, Waltham, MA, USA) by ELISA kits, according to the manufacturer’s instruction. To generate tumor cells-derived supernatants, E0771 and MN-MCA1 tumor cells were seeded in a six well plate (0.1-0.5x106 cell/well respectively) with 2 mL of complete medium for 72 hours. At the end of the culture, cell debris were removed by centrifugation and filtration.

*Endocytosis assays*

*In vitro* uptake experiments of ECM proteins were performed on differentiated WT or *Dab2* KO BMDMs. Collagen I (Corning Inc., New York, USA), collagen IV (BD Biosciences, San Jose, CA, USA), fibronectin and laminin (both from ThermoFisher Scientific, Waltham, MA, USA) were labelled by using the FluoReporter FITC Protein Labeling Kit (ThermoFisher Scientific, Waltham, MA, USA) in accordance with the manufacturer instructions. At day 7 of culture, macrophages were starved in serum-free media at 4°C for 30 minutes, to synchronize cell cycle. Labelled proteins, diluted in serum-free media supplemented with CSF-1 (100 ng/ml), were then added on cells for 2 hours at 4°C to permit binding to cell membranes. Macrophages were incubated at 37°C for 5, 18 or 22 hours. Untreated macrophages were used as basal background control; in addition, cells treated with proteins but not incubated (0-hour control) were used to assess the signal of surface-bound proteins. At the end of culture, cells were resuspended in 0.04% Trypan Blue (Sigma-Aldrich, Saint Louis, MO, USA) to quench the FITC fluorophore on non-endocytosed proteins, fixed in 4% formaldehyde (Sigma-Aldrich, Waltham, MA, USA), and analyzed with LSR II flow cytometer (BD Biosciences, San Jose, CA, USA). The uptake of ECM proteins was expressed as percentage of FITC+ cells normalized on the 0-hour control.

*Real-time PCR*

Total RNA from BM precursors (CD11b+), TAMs and BMDMs was isolated by TRIzol reagent (Thermo Fisher Scientific, Waltham, MA, USA). The amount and purity of isolated RNA was analyzed by the ND-1000 Spectrophotometer (NanoDrop Technologies). cDNA was prepared using the SuperScript® VILO cDNA Synthesis Kit (Thermo Fisher Scientific, Waltham, MA, USA) according to the manufacturer’s instruction. Real Time PCR was run using 2x SYBR Green master mix (ThermoFisher Scientific, Waltham, MA, USA). All samples were normalized using GAPDH endogenous control primers. Post-qRT-PCR analysis to quantify relative gene expression was performed by the comparative Ct method (2−ΔΔCt).

*Western blot (WB)*

Cell lysates were prepared in Laemmli Buffer (for DAB2 detection) or in a lysis buffer (for YAP detection) (3), sonicated and denatured at 100°C. For ITGs detection RIPA buffer (Thermo Scientific, Waltham, MA, USA) was used. Insoluble materials were removed by centrifugation. Samples were subjected to SDS-polyacrylamide 10% Tris-Glycine or Bis-Tris gel electrophoresis and blotted onto PVDF-membrane (Immobilon P membranes, Millipore, Billerica, MA, USA). Tris-buffered saline plus 0.05% Tween-20 and 5% non-fat dry milk were used to block unspecific sites. Membranes were incubated with rabbit anti-DAB2 primary antibody (H-110 clone, Santa Cruz Biotechnology Inc., Dallas, USA), rabbit anti-YAP primary antibody (Proteintech Europe, Manchester, UK), mouse anti-ITGβ1 (BD Bioscience, San Jose, CA, USA), rabbit anti-ITGα5, rabbit anti-ITGα6 (Cell Signalling Technologies, Danvers, MA, USA), and with donkey anti-rabbit or sheep anti-mouse HRP-conjugated secondary antibodies (GE Healthcare, Chicago, Illinois, USA). HRP-conjugated anti-β actin and HRP-conjugated anti-GAPDH (both from Cell Signalling Technologies, Danvers, MA, USA) were used as reference. Proteins were revealed by GE ImageQuant LAS400 with Femto substrate (ThermoFisher Scientific, Waltham, MA, USA).

*Chemotaxis assay*

*In vitro* chemotaxis assays were performed using 8µm pores-transwells (Corning Inc, New York, USA). Serum-deprived RAW264.7 and BMDM cells, WT or *Dab2* KO, were added on top of the filter membrane and let migrate towards the lower chamber containing serum-free media supplemented with 100ng/ml of different cytokines (CXCL12, CCL2 or CCL3; R&D Systems, Minneapolis, USA) or 20% FBS growth media. After 24h, transwell membranes were fixed and stained with crystal violet. The directional movement towards chemokine gradient was assessed using an elution solution containing 50% ethanol and 0.1% acetic acid. Absorbance was measured at 595nm using a microplate reader (VersaMax™, Molecular Devices, San Jose, USA).

*xCELLigence*

Kinetic of cell invasion was monitored using the xCELLigence Real Time Cell Analysis (RTCA) technology (Acea Bioscience, San Diego, CA, USA). For endothelial-invasion assay, SVEC4-10 murine endothelial cells were seeded in E-16-well plates and allowed to grow until they form a confluent monolayer, evidenced by a flattening of cell index. Then, E0771 and monocytes sorted from spleen of tumor-bearing mice, were seeded as mono- or co-culture on the top of the endothelial monolayer. The drop in electrical resistance, due to the retraction of endothelial junctions and penetration by invading cells, was monitored in real-time for at least 12h. Results were normalized to the time of addition of invading cells. The level of cell invasion was assessed by slope analysis of the generated curves.

*Analysis of scRNAseq data*

First expression for each cell was normalized to log (counts*10,000+1) and the *FindVariableFeatures* function with the “vst” method was used to select 2,000 variable genes. Then, principal component analysis was applied to the standardized expression data of the variable genes and the first 30 principal component (PCs) were used in the FindNeighbors followed by FindClusters (setting the k and resolution parameters equal to 20 and 0.8, respectively) to perform clustering. Similar operations were later performed to analyze WT or *Dab2* KO macrophages, this time using the first 22 PCs. T-distributed stochastic neighbor embedding (tSNE) was used to visualize cell populations, using the same number of PCs as input features as was used for clustering. To associate previously identified clusters to cell types, we used a publicly available scRNAseq dataset to select the marker genes of each cell type, i.e. the genes expressed in only one cell type (GSE127465)(4). Then we calculated the z-score for each marker gene across all cells. Finally, to define the score, we calculate the average of z-scores of marker genes of each cell type.


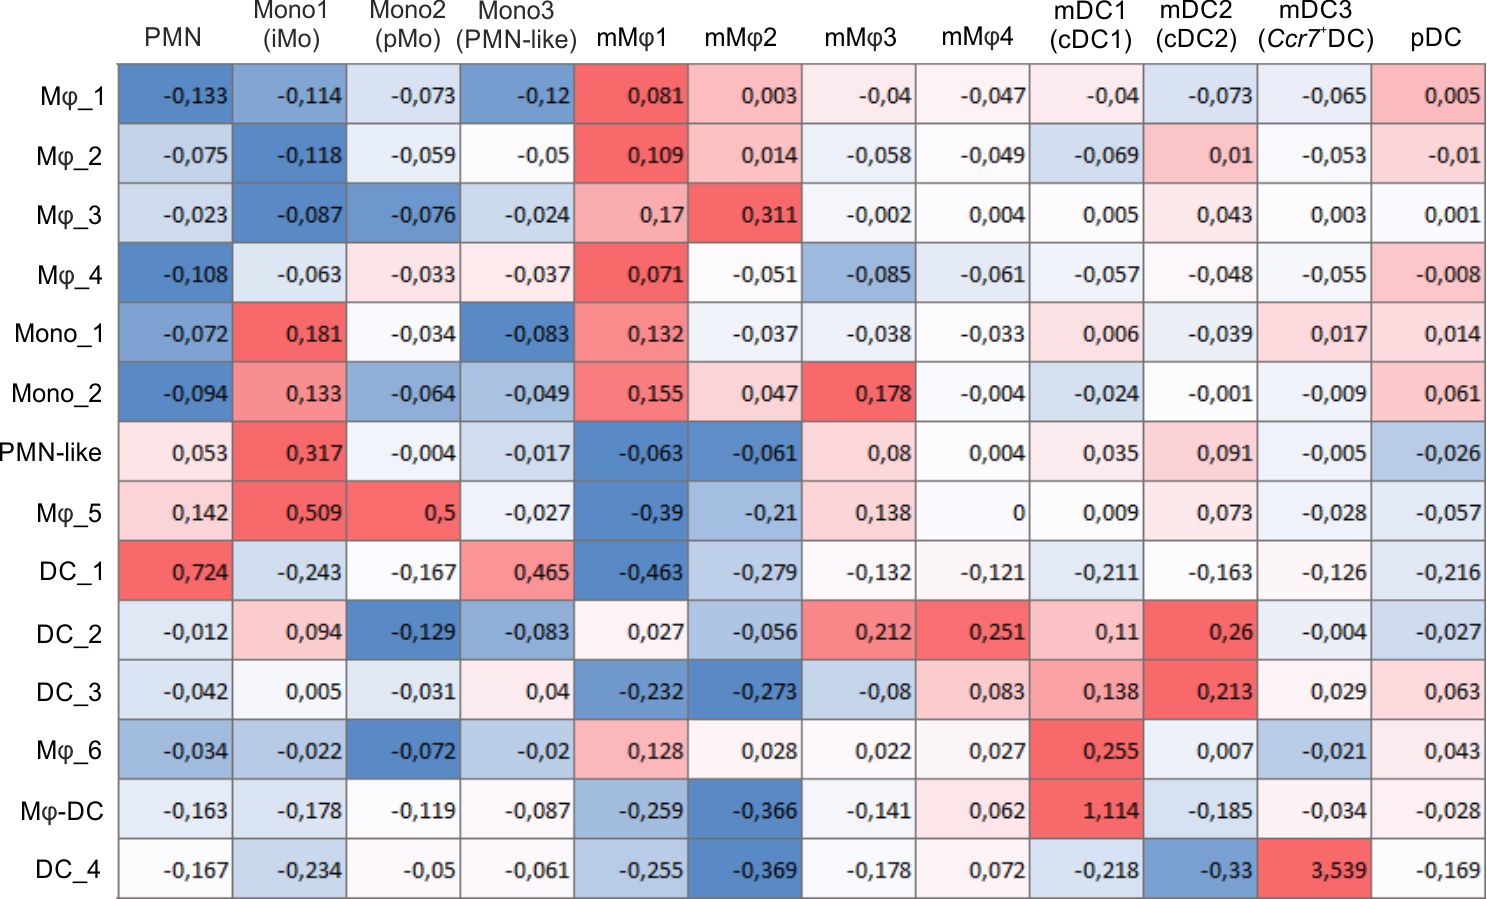


The correlation table above showed the similarity among the clusters defined in Fig.1A and the ones recently published (GSE127465).

Feature plots and violin plots for gene expression were generated with the *FeaturePlot* and *VlnPlot* functions, respectively, using log-normalized expression values. Trajectory analysis was performed separately on WT and *Dab2* KO macrophages with Slingshot, a Bioconductor package designed to model developmental trajectories in scRNAseq data (5). Slingshot starts by finding a minimal spanning tree (MST) on a graph where the nodes are clusters and the edges are weighted by the distances between clusters in the space defined by the first 22 PCs as above. These distances are based on the covariance structure of the clusters in order to capture their shape. Lineages are then defined as ordered sets of clusters created by tracing paths through the MST. The starting cluster was determined by Slingshot.

*Analysis of gene expression data*

Gene expression data of murine invasive TAMs, general TAMs, and splenic macrophages are publicly available at GSE18295 and GSE18404. The annotated gene-centered expression matrix comprising 15,242 unique gene symbols for a total of 18 samples has been obtained from the authors of the original publications (6,7). Data have been normalized, background-corrected and log2 scaled using a robust multi-array procedure (RMA) as implemented in NimbleScan software.

For functional enrichment, the expression profile of *Dab2* in TAMs and normal splenic macrophages has been used as input in the Gene Set Enrichment Analysis software (GSEA) to search for gene sets enriched in genes whose expression was highly correlated with *Dab2*. GSEA software was applied to a list of gene sets comprising adhesion, differentiation, proliferation and survival branches of *Csf1* receptor pathway as defined like in (8); the autophagy pathway as elaborated from (9); the gene sets of the immune system activation, angiogenesis regulation, Wnt signal transduction and the *Yap* conserved signature (10) from the Molecular Signatures Database (MSigDB) collection. Gene sets were considered significantly enriched at FDR ≤0.05 when weighted enrichment statistic, Pearson’s correlation as metric for gene ranking, and 1,000 permutations of gene sets.

To evaluate the prognostic value of *DAB2* gene alone, or in combination with other genes we downloaded breast cancer, liver cancer and gastric cancer gene expression datasets with clinical information from TCGA. For the one gene signature, the expression data were sorted based on the expression level and patients were stratified into low and high groups based on median value (Supplementary Fig. S7 D-E).

To identify two groups of samples with either high or low simultaneous expression scores of *DAB2* and a gene y, we defined a classification rule based on summarizing the standardized expression levels of *DAB2* and gene y into a combined score with zero mean as previously reported (11). Tumors are classified as Low signature if the combined score is negative or High signature if positive (Fig. 7 C-E).

References

1. Sasso MS, Lollo G, Pitorre M, Solito S, Pinton L, Valpione S*, et al.* Low dose gemcitabine-loaded lipid nanocapsules target monocytic myeloid-derived suppressor cells and potentiate cancer immunotherapy. Biomaterials **2016**;96:47-62 doi 10.1016/j.biomaterials.2016.04.010.

2. Marigo I, Zilio S, Desantis G, Mlecnik B, Agnellini AH, Ugel S*, et al.* T Cell Cancer Therapy Requires CD40-CD40L Activation of Tumor Necrosis Factor and Inducible Nitric-Oxide-Synthase-Producing Dendritic Cells. Cancer cell **2016**;30(4):651 doi 10.1016/j.ccell.2016.09.009.

3. Chang L, Azzolin L, Di Biagio D, Zanconato F, Battilana G, Lucon Xiccato R*, et al.* The SWI/SNF complex is a mechanoregulated inhibitor of YAP and TAZ. Nature **2018**;563(7730):265-9 doi 10.1038/s41586-018-0658-1.

4. Zilionis R, Engblom C, Pfirschke C, Savova V, Zemmour D, Saatcioglu HD*, et al.* Single-Cell Transcriptomics of Human and Mouse Lung Cancers Reveals Conserved Myeloid Populations across Individuals and Species. Immunity **2019**;50(5):1317-34 e10 doi 10.1016/j.immuni.2019.03.009.

5. Street K, Risso D, Fletcher RB, Das D, Ngai J, Yosef N*, et al.* Slingshot: cell lineage and pseudotime inference for single-cell transcriptomics. BMC Genomics **2018**;19(1):477 doi 10.1186/s12864-018-4772-0.

6. Ojalvo LS, Whittaker CA, Condeelis JS, Pollard JW. Gene expression analysis of macrophages that facilitate tumor invasion supports a role for Wnt-signaling in mediating their activity in primary mammary tumors. Journal of immunology **2010**;184(2):702-12 doi 10.4049/jimmunol.0902360.

7. Ojalvo LS, King W, Cox D, Pollard JW. High-density gene expression analysis of tumor-associated macrophages from mouse mammary tumors. Am J Pathol **2009**;174(3):1048-64 doi 10.2353/ajpath.2009.080676.

8. Pixley FJ, Stanley ER. CSF-1 regulation of the wandering macrophage: complexity in action. Trends Cell Biol **2004**;14(11):628-38 doi 10.1016/j.tcb.2004.09.016.

9. Jaeger PA, Wyss-Coray T. All-you-can-eat: autophagy in neurodegeneration and neuroprotection. Mol Neurodegener **2009**;4:16 doi 10.1186/1750-1326-4-16.

10. Cordenonsi M, Zanconato F, Azzolin L, Forcato M, Rosato A, Frasson C*, et al.* The Hippo transducer TAZ confers cancer stem cell-related traits on breast cancer cells. Cell **2011**;147(4):759-72 doi 10.1016/j.cell.2011.09.048.

11. Adorno M, Cordenonsi M, Montagner M, Dupont S, Wong C, Hann B*, et al.* A Mutant-p53/Smad complex opposes p63 to empower TGFbeta-induced metastasis. Cell **2009**;137(1):87-98 doi 10.1016/j.cell.2009.01.039.
