# Supplementary material for: Disabled Homolog 2 Controls Prometastatic Activity of Tumor-Associated Macrophages
Source: Oxford University Press journal article supplement (doi:10.1158/2159-8290.cd-20-0036), 2020-07-10
Supplement: 21598290cd200036-sup-235391_2_supp_6396140_qcxxxq.xlsx [file 21598290cd200036-sup-235391_2_supp_6396140_qcxxxq.xlsx]

## Sheet: cluster_markers_all cells
	MΦ1							MΦ2							MΦ3							MΦ4							MΦ5							MΦ6							Mono1
	GeneName	avg_logFC	Fraction of expressing cells in MΦ1	Fraction of expressing cells in non-MΦ1	p_val	p_val_adj		GeneName	avg_logFC	Fraction of expressing cells in MΦ2	Fraction of expressing cells in non-MΦ2	p_val	p_val_adj		GeneName	avg_logFC	Fraction of expressing cells in MΦ3	Fraction of expressing cells in non-MΦ3	p_val	p_val_adj		GeneName	avg_logFC	Fraction of expressing cells in MΦ4	Fraction of expressing cells in non-MΦ4	p_val	p_val_adj		GeneName	avg_logFC	Fraction of expressing cells in MΦ5	Fraction of expressing cells in non-MΦ5	p_val	p_val_adj		GeneName	avg_logFC	Fraction of expressing cells in MΦ6	Fraction of expressing cells in non-MΦ6	p_val	p_val_adj		GeneName	avg_logFC	Fraction of expressing cells in Mono1	Fraction of expressing cells in non-Mono1	p_val	p_val_adj
	Cd74	0.651317	1	0.989	3.93812e-190	6.13362e-186		Rgs1	1.06462	0.994	0.87	1.61208e-232	2.51081e-228		Ctsd	1.31102	0.985	0.825	3.61267e-181	5.62674e-177		Dnajb1	0.978885	0.777	0.624	1.76139e-44	2.74337e-40		Ifit3	1.99056	0.886	0.124	6.38664e-287	9.94719e-283		Ccl8	3.17263	0.639	0.071	7.01246e-69	1.09219e-64		Ccr2	1.49399	0.931	0.238	9.79989e-252	1.52633e-247
	Ctss	0.630855	1	0.983	3.55564e-209	5.53792e-205		Atf3	1.00275	0.969	0.772	3.37413e-185	5.2552e-181		Spp1	0.963793	0.395	0.266	9.90177e-15	1.5422e-10		Klra17	0.963582	0.503	0.089	2.29498e-151	3.57443e-147		Ccl12	1.92883	0.828	0.439	2.81916e-73	4.39085e-69		Pf4	2.56871	0.902	0.223	3.80496e-55	5.92623e-51		Chil3	1.16496	0.514	0.121	1.62581e-112	2.53221e-108
	Hexb	0.602962	0.996	0.879	2.42243e-137	3.77294e-133		Fos	0.985053	0.998	0.929	8.11462e-238	1.26385e-233		Mmp12	0.958384	0.426	0.235	2.36988e-33	3.69108e-29		Ccl5	0.887158	0.598	0.472	1.23628e-23	1.92551e-19		Isg15	1.78191	0.956	0.346	1.98202e-158	3.08699e-154		Fcrls	1.69576	0.934	0.165	9.98039e-68	1.55445e-63		Ccl2	1.15927	0.628	0.307	2.96521e-53	4.61831e-49
	H2-Aa	0.595861	1	0.972	4.96425e-191	7.73182e-187		Dnajb1	0.980284	0.85	0.595	5.77533e-116	8.99508e-112		Lgals3	0.858195	0.99	0.855	4.13524e-132	6.44063e-128		Hsp90aa1	0.74027	0.928	0.892	1.48973e-37	2.32026e-33		Cxcl10	1.66295	0.527	0.187	3.43991e-53	5.35766e-49		Mrc1	1.66433	0.852	0.128	1.17496e-73	1.83e-69		S100a4	1.15087	0.789	0.273	1.27734e-126	1.98945e-122
	H2-Eb1	0.586686	0.998	0.971	1.15607e-187	1.80058e-183		Ccl4	0.976865	0.974	0.87	1.97289e-145	3.07277e-141		Mt2	0.739207	0.365	0.097	1.43026e-93	2.22764e-89		Klra2	0.714993	0.731	0.543	2.95114e-48	4.59639e-44		Ifit2	1.56842	0.766	0.098	3.08062e-247	4.79807e-243		Folr2	1.60641	0.443	0.012	1.83386e-150	2.85624e-146		S100a6	1.13035	0.899	0.453	1.45458e-113	2.26551e-109
	Ms4a7	0.578284	0.986	0.739	1.45983e-117	2.27369e-113		Fosb	0.949861	0.926	0.641	2.64326e-176	4.11687e-172		Ctsb	0.73321	0.999	0.965	5.83367e-143	9.08594e-139		Fyb	0.71353	0.977	0.877	4.88848e-84	7.61381e-80		Rsad2	1.49346	0.597	0.089	8.1946e-158	1.27631e-153		Gas6	1.46577	0.656	0.085	5.30909e-61	8.26891e-57		Plac8	1.1294	0.748	0.359	1.57171e-83	2.44794e-79
	Apoe	0.571584	1	1	3.98312e-125	6.20371e-121		Jun	0.945893	0.998	0.933	1.08927e-244	1.69654e-240		Prdx1	0.724888	0.99	0.88	5.83626e-129	9.08998e-125		Cd72	0.709379	0.887	0.757	3.47482e-61	5.41203e-57		Irf7	1.3732	0.938	0.364	2.1343e-134	3.32417e-130		Ccl7	1.43799	0.541	0.103	6.97604e-31	1.08652e-26		S100a10	1.10249	0.851	0.396	1.17095e-108	1.82375e-104
	C1qa	0.558919	1	0.922	1.8488e-156	2.8795e-152		H2-M2	0.927272	0.516	0.24	4.43274e-72	6.90399e-68		Trem2	0.710479	0.925	0.573	8.20295e-133	1.27761e-128		Btg2	0.64588	0.953	0.905	4.89937e-53	7.63077e-49		Ifi204	1.29804	0.978	0.535	1.68291e-133	2.62114e-129		Sepp1	1.39355	1	0.83	7.49013e-32	1.16659e-27		Vim	1.04747	0.894	0.526	6.08214e-83	9.47294e-79
	H2-Ab1	0.558122	0.998	0.992	3.65331e-147	5.69003e-143		Hspa1a	0.916379	0.988	0.889	3.4809e-162	5.4215e-158		Cd63	0.677659	0.994	0.826	6.92942e-144	1.07926e-139		Pou2f2	0.64004	0.801	0.643	5.99075e-41	9.33059e-37		Ms4a4c	1.24952	0.85	0.367	3.25227e-91	5.06541e-87		Pltp	1.32351	0.656	0.121	5.44581e-40	8.48185e-36		Lgals1	0.964612	0.885	0.471	6.02283e-102	9.38055e-98
	AW112010	0.514268	0.937	0.77	5.28815e-87	8.2363e-83		Klf6	0.888036	0.981	0.87	1.9603e-172	3.05316e-168		Igf1	0.671676	0.359	0.062	9.36437e-141	1.4585e-136		Rsrp1	0.637948	0.898	0.779	2.63577e-54	4.10521e-50		Ifi203	1.23857	0.85	0.341	7.4381e-107	1.15848e-102		Mgl2	1.222	0.426	0.083	5.26974e-23	8.20762e-19		Ahnak	0.954723	0.679	0.159	7.63792e-154	1.18961e-149
	Cd81	0.507384	0.994	0.801	4.10085e-111	6.38708e-107		Mmp12	0.848629	0.47	0.224	7.29765e-60	1.13661e-55		Lpl	0.631934	0.649	0.307	2.24127e-78	3.49077e-74		Gk	0.606653	0.499	0.25	1.02756e-44	1.60042e-40		Phf11b	1.19485	0.923	0.465	2.22959e-112	3.47259e-108		F13a1	1.21659	0.459	0.089	4.86076e-25	7.57063e-21		Ifi27l2a	0.930194	0.931	0.727	3.77269e-72	5.87596e-68
	Tmem176b	0.494097	0.985	0.819	2.63849e-119	4.10946e-115		Dusp1	0.790359	0.983	0.835	1.42799e-151	2.22409e-147		Mif	0.589045	0.905	0.652	1.08491e-87	1.68975e-83		Acp5	0.602219	0.869	0.705	1.48854e-50	2.31839e-46		Usp18	1.15611	0.696	0.119	2.76135e-171	4.3008e-167		Maf	1.17863	0.803	0.269	1.31398e-30	2.04652e-26		Ccl6	0.915316	0.837	0.574	1.02249e-60	1.59253e-56
	Tmem176a	0.482211	0.963	0.783	5.75832e-95	8.96858e-91		Hsp90aa1	0.766593	0.976	0.879	1.03794e-114	1.61658e-110		Mt1	0.583364	0.967	0.79	4.41976e-75	6.88378e-71		Tmcc3	0.583958	0.743	0.5	5.90164e-41	9.19181e-37		Mnda	1.15476	0.773	0.2	4.72857e-136	7.36475e-132		Cbr2	1.17028	0.443	0.016	5.93509e-121	9.24391e-117		Fn1	0.874012	0.489	0.108	6.25464e-108	9.7416e-104
	C1qc	0.480104	0.999	0.897	3.1501e-116	4.90627e-112		Rgs2	0.762377	0.978	0.903	9.48972e-121	1.47802e-116		Timp2	0.569925	0.856	0.531	1.23732e-94	1.92713e-90		Ganc	0.569195	0.442	0.24	6.62627e-30	1.03204e-25		Ifit1	1.13071	0.557	0.067	2.10617e-172	3.28037e-168		Fcgrt	1.12473	0.721	0.334	9.41619e-18	1.46657e-13		Ly6c2	0.834864	0.468	0.131	5.99867e-78	9.34293e-74
	C1qb	0.473719	1	0.942	2.0315e-121	3.16406e-117		Ubc	0.756093	1	0.984	3.58836e-213	5.58886e-209		Aldoa	0.55265	0.969	0.83	4.01747e-88	6.25722e-84		Socs6	0.562343	0.512	0.262	2.73103e-43	4.25358e-39		Phf11d	1.1243	0.773	0.221	3.32461e-125	5.17808e-121		Ccl12	1.02216	0.738	0.456	3.11292e-09	4.84838e-05		Ifitm3	0.833753	0.956	0.731	6.68059e-74	1.0405e-69
	Itm2b	0.473376	0.999	0.979	1.68126e-148	2.61857e-144		Gm26825	0.732558	0.742	0.522	1.29226e-68	2.01269e-64		Syngr1	0.544952	0.396	0.072	1.94034e-151	3.02207e-147		Tgfbr1	0.561495	0.907	0.704	9.76994e-40	1.52167e-35		Mx1	1.09542	0.59	0.076	1.078e-177	1.67898e-173		Stab1	0.987345	0.803	0.416	9.86182e-17	1.53598e-12		Ccl9	0.817889	0.828	0.557	3.88234e-54	6.04675e-50
	Gdf3	0.470395	0.381	0.259	4.13468e-19	6.43976e-15		Cd83	0.711555	0.819	0.519	3.09454e-107	4.81975e-103		Sgk1	0.541211	0.674	0.359	1.84266e-64	2.86994e-60		Malat1	0.551229	0.998	0.997	1.12287e-56	1.74887e-52		Stat1	1.07089	0.85	0.316	3.51376e-113	5.47268e-109		Cd38	0.968428	0.607	0.123	2.34247e-33	3.64839e-29		Lyz2	0.796262	0.993	0.976	8.79635e-56	1.37003e-51
	Qpct	0.465322	0.617	0.375	7.99259e-59	1.24485e-54		Hspa5	0.695544	0.985	0.886	2.4622e-108	3.83487e-104		Tpi1	0.537522	0.837	0.595	2.71523e-63	4.22896e-59		Zmynd15	0.538211	0.824	0.616	2.22177e-39	3.46041e-35		Gm4955	1.05655	0.663	0.094	1.50892e-186	2.35014e-182		Ccl6	0.958569	0.754	0.595	1.2579e-06	0.0195918		Tmsb10	0.78994	0.966	0.615	1.38567e-100	2.15818e-96
	Ly86	0.46217	0.987	0.865	4.39542e-113	6.84587e-109		Tmx4	0.676829	0.574	0.326	6.27933e-61	9.78006e-57		Blvrb	0.533218	0.838	0.503	7.35433e-86	1.14544e-81		Xist	0.534513	0.993	0.944	3.67876e-47	5.72968e-43		Rtp4	1.04628	0.883	0.302	1.17762e-124	1.83414e-120		C4b	0.91923	0.492	0.045	4.26651e-59	6.64509e-55		Crip1	0.752199	0.968	0.68	4.88534e-87	7.60892e-83
	Acp5	0.459721	0.903	0.675	2.90869e-71	4.53028e-67		Jund	0.668852	0.964	0.858	1.66239e-109	2.58917e-105		Fcrls	0.532168	0.377	0.136	4.47654e-61	6.9722e-57		Smad7	0.530822	0.533	0.333	7.13613e-26	1.11145e-21		Oasl2	1.04215	0.795	0.223	7.4673e-127	1.16303e-122		Ltc4s	0.910862	0.541	0.199	1.79343e-13	2.79326e-09		Anxa2	0.750137	0.745	0.345	3.7958e-70	5.91197e-66
	Serinc3	0.429601	0.954	0.851	6.15391e-74	9.58472e-70		Chka	0.641454	0.533	0.295	3.88212e-58	6.0464e-54		Plin2	0.516062	0.833	0.567	7.01507e-60	1.0926e-55		Socs3	0.530808	0.84	0.774	6.12173e-27	9.53459e-23		Oasl1	1.03676	0.619	0.104	9.23766e-147	1.43877e-142		Gpr34	0.894236	0.557	0.233	4.76754e-12	7.42545e-08		Capg	0.74893	0.583	0.204	4.47828e-79	6.97491e-75
	Tmem119	0.426185	0.875	0.576	5.22602e-73	8.13953e-69		Klf2	0.63063	0.821	0.671	1.62091e-46	2.52457e-42		Ftl1	0.513632	1	0.998	4.70741e-175	7.33179e-171		Hspb1	0.52302	0.251	0.176	2.68085e-06	0.0417543		Fcgr1	1.03001	0.945	0.662	5.49615e-81	8.56026e-77		Dab2	0.856348	0.836	0.437	4.44765e-17	6.92722e-13		Sirpb1c	0.747021	0.743	0.274	1.09984e-103	1.713e-99
	Lilra5	0.413229	0.732	0.437	1.50078e-67	2.33746e-63		Hsph1	0.603668	0.543	0.277	1.37152e-73	2.13614e-69		Gapdh	0.497723	0.999	0.941	2.52449e-91	3.93189e-87		Pld4	0.52149	0.878	0.843	1.22378e-41	1.90603e-37		Pydc4	1.02574	0.689	0.131	5.21132e-151	8.11663e-147		Igfbp4	0.82504	0.475	0.061	1.50738e-41	2.34774e-37		Tgfbi	0.745336	0.984	0.854	1.10136e-73	1.71536e-69
	Tgfbr1	0.40936	0.916	0.675	1.85312e-76	2.88623e-72		Egr1	0.600337	0.78	0.531	4.63702e-79	7.22216e-75		Fabp5	0.497357	0.369	0.199	1.88056e-27	2.92897e-23		Hspa1a	0.508309	0.95	0.902	1.07438e-33	1.67334e-29		Mndal	1.02538	0.883	0.421	1.68313e-92	2.62147e-88		Clec4n	0.779147	0.705	0.408	7.48392e-11	1.16562e-06		F13a1	0.657757	0.429	0.062	7.83689e-137	1.2206e-132
	Rtcb	0.407684	0.824	0.628	2.00827e-70	3.12788e-66		Gadd45g	0.591281	0.688	0.53	4.4059e-38	6.86219e-34		Pld3	0.496132	0.648	0.319	5.42557e-78	8.45032e-74		Ly6e	0.49831	0.928	0.834	1.77085e-42	2.75809e-38		Ifi47	0.944178	0.645	0.146	5.84852e-118	9.10907e-114		Hpgd	0.776957	0.623	0.253	7.4662e-14	1.16286e-09		Emb	0.653495	0.716	0.272	3.39543e-92	5.28838e-88
	Adgre1	0.406788	0.834	0.62	1.76334e-60	2.74641e-56		Rhob	0.588867	0.865	0.6	1.34576e-93	2.09602e-89		Vcam1	0.495319	0.643	0.372	2.21365e-48	3.44775e-44		Ccl4	0.497666	0.912	0.885	1.20834e-27	1.882e-23		Fgl2	0.925364	0.755	0.406	4.44328e-52	6.92041e-48		Lgals1	0.765658	0.836	0.502	1.32577e-10	2.06489e-06		Ms4a4c	0.628371	0.697	0.364	7.1813e-50	1.11849e-45
	Kdm6b	-0.406307	0.143	0.347	1.60599e-37	2.50133e-33		Tmem119	0.577884	0.891	0.581	2.7913e-94	4.34745e-90		Ctsz	0.4861	0.994	0.955	2.50332e-123	3.89892e-119		Hpgds	0.488529	0.813	0.619	9.82192e-30	1.52976e-25		Zbp1	0.91772	0.784	0.288	9.59342e-93	1.49417e-88		Rnase4	0.76033	0.918	0.576	3.5516e-15	5.53161e-11		Pid1	0.60414	0.807	0.544	2.13725e-47	3.32877e-43
	Cdk2ap2	-0.409015	0.587	0.661	9.8041e-10	1.52699e-05		Cebpa	0.561704	0.803	0.592	1.40519e-68	2.18859e-64		Cd68	0.477919	0.975	0.837	2.06942e-97	3.22313e-93		Acox3	0.486327	0.503	0.44	5.71684e-09	8.90397e-05		Ccl5	0.908408	0.619	0.475	5.98845e-11	9.327e-07		Ehd4	0.75693	0.918	0.663	5.21081e-16	8.11584e-12		Msr1	0.602827	0.463	0.173	2.61527e-53	4.07329e-49
	Cfp	-0.41113	0.145	0.272	3.52046e-19	5.48311e-15		Btg2	0.560653	0.983	0.895	1.17463e-100	1.82949e-96		Lgmn	0.47561	0.998	0.888	2.49881e-82	3.89189e-78		Lmo4	0.484863	0.483	0.356	8.63441e-16	1.34481e-11		Bst2	0.893314	0.993	0.84	6.07307e-84	9.45881e-80		Pid1	0.743434	0.803	0.564	3.4632e-12	5.39393e-08		Cfp	0.584847	0.567	0.219	2.96818e-61	4.62294e-57
	AB124611	-0.42059	0.212	0.382	1.73119e-27	2.69633e-23		Zfp36	0.548343	0.978	0.876	5.97246e-103	9.30211e-99		Gpr137b	0.460083	0.584	0.24	4.10613e-90	6.3953e-86		Tnfsf13b	0.48024	0.571	0.386	6.64909e-25	1.0356e-20		Tor3a	0.88426	0.842	0.381	8.95174e-86	1.39423e-81		Nrp1	0.722734	0.754	0.492	5.73148e-10	8.92678e-06		Alox5ap	0.565205	0.954	0.707	1.91501e-68	2.98263e-64
	Il1a	-0.421057	0.235	0.321	1.24335e-10	1.93651e-06		Socs3	0.531607	0.893	0.757	5.0601e-56	7.88111e-52		Pgam1	0.448832	0.828	0.59	3.76267e-56	5.86036e-52		Impact	0.476096	0.375	0.24	1.51865e-15	2.3653e-11		Xaf1	0.88021	0.773	0.273	4.30071e-93	6.69836e-89		Cltc	0.722221	0.721	0.436	5.3029e-12	8.25926e-08		Cd44	0.56327	0.759	0.406	1.06578e-54	1.65996e-50
	Slc16a3	-0.422592	0.161	0.262	5.44463e-13	8.48001e-09		Dusp6	0.523168	0.7	0.507	2.3395e-46	3.64377e-42		Lipa	0.441072	0.773	0.478	8.13325e-59	1.26675e-54		Clec4a1	0.473989	0.381	0.229	1.35839e-17	2.11569e-13		Parp14	0.876378	0.659	0.208	6.15187e-83	9.58153e-79		Itm2b	0.721359	1	0.982	1.5164e-19	2.3618e-15		Ifitm2	0.551311	0.927	0.641	1.32243e-65	2.05968e-61
	Btg2	-0.4273	0.835	0.927	2.20717e-29	3.43767e-25		Il1a	0.519387	0.543	0.257	1.18029e-76	1.8383e-72		Lilr4b	0.437698	0.783	0.476	4.81791e-58	7.50389e-54		PISD	0.467525	0.578	0.497	2.67856e-11	4.17186e-07		Pyhin1	0.87548	0.736	0.268	7.70556e-83	1.20014e-78		Fcgr2b	0.707093	0.967	0.733	2.59975e-15	4.04911e-11		S100a11	0.542103	0.908	0.57	2.21228e-67	3.44563e-63
	Pgam1	-0.428664	0.538	0.649	7.62358e-21	1.18737e-16		Tagap	0.51273	0.519	0.332	5.48475e-41	8.5425e-37		Cotl1	0.422935	0.988	0.929	1.66966e-83	2.60049e-79		Cebpa	0.465731	0.722	0.619	2.79279e-18	4.34978e-14		Phf11a	0.83166	0.615	0.12	1.37265e-127	2.13789e-123		Dhrs3	0.699112	0.689	0.347	3.10349e-12	4.83369e-08		Clec4a1	0.54091	0.619	0.207	1.24375e-79	1.93715e-75
	Hmox1	-0.429932	0.434	0.506	1.74729e-08	0.00027214		Jmjd1c	0.50964	0.777	0.552	2.37558e-68	3.69997e-64		Lgals1	0.417106	0.699	0.47	1.93147e-36	3.00827e-32		Klrb1b	0.45916	0.433	0.252	9.73138e-24	1.51566e-19		Ifit3b	0.830749	0.462	0.034	8.77382e-199	1.36652e-194		Trf	0.689837	0.934	0.74	5.68909e-13	8.86076e-09		Tagln2	0.54018	0.803	0.511	1.41394e-40	2.20222e-36
	Nlrp3	-0.430361	0.11	0.288	1.95015e-32	3.03736e-28		Dnaja1	0.503341	0.873	0.744	2.19568e-54	3.41977e-50		Cstb	0.40788	0.944	0.722	7.73823e-90	1.20523e-85		Adap2	0.456374	0.58	0.414	9.34625e-23	1.45568e-18		Ifi44	0.829969	0.513	0.066	2.28505e-147	3.55897e-143		Npl	0.682923	0.344	0.072	4.21928e-17	6.57153e-13		Emp3	0.535781	0.892	0.623	2.16778e-51	3.37632e-47
	Nfkbid	-0.440462	0.132	0.309	2.64338e-30	4.11707e-26		Ccl3	0.495021	0.927	0.815	8.91698e-82	1.38882e-77		AA467197	0.406214	0.485	0.28	2.86354e-31	4.45996e-27		Ctla2b	0.454315	0.343	0.183	9.14521e-21	1.42437e-16		Tmcc3	0.81575	0.894	0.5	1.18642e-65	1.84785e-61		Apoe	0.676592	1	1	1.06182e-14	1.65379e-10		Gda	0.527295	0.505	0.123	8.49949e-93	1.3238e-88
	Hist1h1c	-0.442188	0.196	0.316	1.34211e-15	2.09034e-11		Apoe	0.492618	1	1	1.88043e-98	2.92876e-94		Cdk2ap2	-0.407181	0.677	0.641	7.1367e-06	0.111154		Id2	0.452255	0.666	0.598	1.33462e-09	2.07868e-05		AI607873	0.793666	0.905	0.594	4.63529e-64	7.21946e-60		Wwp1	0.665924	0.525	0.128	4.26833e-23	6.64792e-19		Emilin2	0.520509	0.576	0.184	1.53929e-79	2.39745e-75
	Gna13	-0.447779	0.389	0.593	2.49949e-42	3.89295e-38		Rnf121	0.490977	0.574	0.314	7.29767e-65	1.13661e-60		Junb	-0.418972	0.969	0.95	2.02405e-12	3.15245e-08		AW112010	0.448802	0.896	0.793	7.15709e-39	1.11472e-34		Fcgr4	0.788397	0.875	0.628	1.43603e-47	2.23662e-43		Nxpe5	0.655854	0.344	0.025	2.39594e-50	3.73167e-46		Gm9733	0.511792	0.388	0.085	7.87514e-80	1.22655e-75
	Ier5	-0.450049	0.817	0.919	9.69939e-52	1.51068e-47		Hspa8	0.489383	0.999	0.977	3.26278e-126	5.08178e-122		Clec4a1	-0.436452	0.121	0.264	3.19162e-22	4.97094e-18		Slc3a2	0.448638	0.81	0.773	1.00464e-17	1.56472e-13		Iigp1	0.787161	0.26	0.011	7.26495e-151	1.13152e-146		Ctsc	0.653301	1	0.907	9.02397e-15	1.40548e-10		Dbi	0.505568	0.89	0.663	1.95913e-48	3.05134e-44
	Pmaip1	-0.45062	0.296	0.488	6.88635e-33	1.07255e-28		Cd74	0.486115	1	0.989	2.49418e-121	3.88468e-117		Nr4a1	-0.459262	0.31	0.368	1.31875e-07	0.00205395		Gm26522	0.44827	0.463	0.359	2.99202e-09	4.66006e-05		Ch25h	0.78397	0.403	0.142	4.01163e-35	6.24811e-31		Serinc3	0.649712	0.967	0.87	1.23749e-11	1.92739e-07		Itgam	0.504573	0.635	0.255	5.00314e-66	7.79238e-62
	Cdkn2d	-0.453835	0.074	0.271	4.87643e-41	7.59504e-37		Lpl	0.47785	0.548	0.324	2.32672e-43	3.62387e-39		Btg2	-0.475736	0.902	0.911	4.55194e-23	7.08964e-19		Dnaja1	0.446497	0.806	0.762	6.81542e-17	1.0615e-12		Nt5c3	0.778767	0.568	0.185	8.27234e-69	1.28842e-64		Tmem106a	0.64696	0.721	0.372	1.09255e-12	1.70165e-08		Shfm1	0.501246	0.979	0.869	2.94307e-66	4.58384e-62
	Emp3	-0.45785	0.552	0.668	4.10244e-28	6.38954e-24		Bag3	0.46853	0.379	0.191	1.93956e-43	3.02086e-39		Irf7	-0.501613	0.296	0.412	8.18403e-17	1.27466e-12		Gm8730	0.431928	0.79	0.504	1.72074e-40	2.68006e-36		Lgals3bp	0.767403	0.85	0.497	1.13063e-57	1.76096e-53		Cd302	0.645235	0.77	0.431	1.29369e-11	2.01491e-07		Pltp	0.498944	0.303	0.112	4.08565e-32	6.36341e-28
	Sgk1	-0.460359	0.282	0.438	1.23804e-23	1.92825e-19		Ier2	0.467346	0.893	0.767	2.63227e-49	4.09976e-45		Isg15	-0.57284	0.33	0.387	3.98342e-08	0.000620417		Gadd45g	0.429206	0.591	0.553	2.61648e-06	0.0407516		Trim30a	0.760389	0.824	0.401	1.54353e-69	2.40404e-65		Timp2	0.637866	0.885	0.578	2.12397e-11	3.30809e-07		Mrpl33	0.479862	0.862	0.541	3.37175e-55	5.2515e-51
	Sirpb1c	-0.46075	0.2	0.34	3.49586e-21	5.4448e-17		Lilra5	0.463778	0.716	0.448	2.1389e-65	3.33134e-61		S100a10	-0.575494	0.417	0.438	7.5798e-06	0.118055		Ier5	0.42728	0.912	0.899	7.22609e-25	1.12546e-20		Cd69	0.755227	0.52	0.261	6.52961e-26	1.01699e-21		Igf1	0.63146	0.525	0.104	1.47367e-26	2.29523e-22		Aprt	0.476121	0.798	0.538	1.6327e-38	2.54293e-34
	Ninj1	-0.46305	0.34	0.473	2.23527e-19	3.48143e-15		Ubb	0.452404	0.999	0.993	9.75714e-78	1.51968e-73		Ms4a4c	-0.622777	0.252	0.418	1.1425e-29	1.77945e-25		Stx16	0.426977	0.621	0.519	5.87987e-16	9.1579e-12		Herc6	0.723132	0.516	0.112	2.6576e-91	4.13922e-87		Txnip	0.619508	0.754	0.458	2.53019e-09	3.94077e-05		Tgm2	0.471713	0.417	0.223	2.32403e-22	3.61967e-18
	Smpdl3a	-0.463434	0.318	0.452	5.03008e-20	7.83435e-16		Csf1r	0.44337	0.973	0.827	2.13688e-94	3.32819e-90		Ccr2	-0.670564	0.173	0.32	4.08345e-22	6.35997e-18		Clec12a	0.421556	0.451	0.347	3.97007e-12	6.18338e-08		AW112010	0.718788	0.949	0.794	2.80943e-44	4.37569e-40		Tmem176b	0.615499	0.967	0.849	1.08448e-13	1.68909e-09		Ms4a6c	0.46911	0.956	0.838	1.53549e-47	2.39152e-43
	Emilin2	-0.471277	0.065	0.253	2.43257e-39	3.78873e-35		Tnf	0.442203	0.659	0.436	2.15498e-49	3.35639e-45		Ccl6	-0.68155	0.615	0.593	3.9062e-07	0.00608391		Vgll4	0.420895	0.424	0.331	8.43401e-10	1.3136e-05		Rnf213	0.713574	0.575	0.168	8.01731e-75	1.2487e-70		Fcgr3	0.613358	1	0.87	6.82887e-19	1.0636e-14		Osm	0.465633	0.548	0.314	6.00006e-25	9.3451e-21
	Txn1	-0.472405	0.699	0.768	2.12979e-27	3.31714e-23		Cybb	0.439533	0.974	0.862	1.36761e-82	2.13005e-78		Ifi27l2a	-0.688984	0.7	0.753	8.46193e-29	1.31795e-24		Ms4a7	0.420573	0.964	0.769	6.59657e-34	1.02742e-29		Sp110	0.711138	0.703	0.343	2.04841e-53	3.19039e-49		Rgl1	0.610181	0.426	0.082	2.29898e-23	3.58066e-19		Sec61b	0.464917	0.947	0.751	1.53132e-53	2.38503e-49
	Card19	-0.476767	0.322	0.511	8.19448e-32	1.27629e-27		Tpp2	0.437637	0.569	0.389	1.35678e-42	2.11319e-38		Napsa	-0.722996	0.211	0.403	6.72105e-38	1.0468e-33		Ctsh	0.420461	0.966	0.936	2.55604e-37	3.98103e-33		Irgm1	0.70795	0.593	0.183	1.96852e-74	3.06598e-70		Lyz2	0.589883	1	0.977	3.59144e-16	5.59367e-12		Jarid2	0.458423	0.456	0.161	2.78635e-55	4.33974e-51
	Cytip	-0.478534	0.248	0.442	1.35657e-35	2.11285e-31		St3gal6	0.434331	0.528	0.263	9.13595e-64	1.42292e-59		Marcksl1	-0.739604	0.227	0.297	1.49904e-08	0.000233475		Hspe1	0.419575	0.856	0.843	1.09066e-17	1.69871e-13		Cited2	0.707742	0.619	0.389	5.21221e-22	8.11801e-18		Grn	0.589641	0.967	0.863	6.81865e-14	1.062e-09		Adgre5	0.455522	0.585	0.231	2.11517e-55	3.29437e-51
	H3f3a	-0.479066	0.968	0.971	1.3588e-54	2.11633e-50		Sqstm1	0.425237	0.737	0.54	3.67675e-56	5.72653e-52		Ifitm2	-0.848581	0.649	0.668	2.17725e-15	3.39106e-11		Ogt	0.416284	0.614	0.54	3.57346e-10	5.56567e-06		Ccnd1	0.69649	0.711	0.327	8.89947e-54	1.38609e-49		Clec4b1	0.588076	0.41	0.106	5.21661e-15	8.12487e-11		Rplp0	0.453118	0.993	0.976	1.955e-76	3.04491e-72
	Rel	-0.482856	0.332	0.556	3.84527e-46	5.989e-42		Klf4	0.418395	0.517	0.375	2.46202e-21	3.8346e-17		Ly6e	-0.913085	0.728	0.863	3.37395e-107	5.25493e-103		Cd81	0.415008	0.935	0.829	1.8907e-33	2.94477e-29		Ifih1	0.685315	0.586	0.182	1.3993e-69	2.17941e-65		Pla2g7	0.586197	0.82	0.595	1.50404e-09	2.34254e-05		Tppp3	0.451179	0.381	0.135	3.07147e-41	4.78382e-37
	Metrnl	-0.484361	0.284	0.508	4.02435e-44	6.26793e-40		Mafb	0.41725	0.915	0.753	2.6492e-36	4.12613e-32		S100a11	-0.941993	0.579	0.602	4.66571e-16	7.26684e-12		Dnajb4	0.413322	0.345	0.22	1.19522e-13	1.86155e-09		Cd40	0.68181	0.374	0.114	1.40218e-40	2.18389e-36		Glul	0.58467	0.721	0.511	1.46991e-07	0.00228939		Sec61g	0.445526	0.945	0.831	1.94874e-43	3.03517e-39
	Lilr4b	-0.488776	0.377	0.559	2.12338e-34	3.30716e-30		Serinc3	0.417164	0.972	0.851	3.40783e-71	5.30769e-67		Il1b	-1.03847	0.762	0.8	3.69995e-18	5.76267e-14		Nfkbiz	0.406504	0.79	0.647	7.18061e-24	1.11838e-19		Mmp13	0.675642	0.271	0.104	1.00079e-18	1.55873e-14		Clec12a	0.574611	0.639	0.352	5.51315e-09	8.58674e-05		Tspo	0.431747	0.936	0.832	1.34639e-38	2.09701e-34
	Slfn2	-0.488905	0.481	0.607	4.58349e-22	7.13878e-18		Asph	0.416879	0.597	0.388	1.08906e-46	1.69621e-42		Tmsb10	-1.12274	0.664	0.641	2.69936e-13	4.20425e-09		Rpsa	-0.407822	0.919	0.962	7.44132e-33	1.15898e-28		Scimp	0.666856	0.912	0.633	8.54906e-48	1.33152e-43		Clec10a	0.573352	0.295	0.065	4.27017e-13	6.6508e-09		Dok2	0.431208	0.294	0.045	2.8414e-89	4.42548e-85
	Cstb	-0.489675	0.696	0.771	9.94243e-23	1.54853e-18		Gm26532	0.4108	0.485	0.24	6.8478e-58	1.06654e-53		S100a4	-1.27025	0.215	0.335	7.68359e-21	1.19672e-16		Pkm	-0.41656	0.646	0.835	8.84996e-17	1.37838e-12		Tor1aip1	0.662959	0.872	0.576	1.1568e-54	1.80171e-50		C5ar1	0.568538	0.738	0.476	2.30985e-07	0.00359759		Cebpb	0.427521	0.908	0.728	1.17779e-51	1.83441e-47
	Mrpl33	-0.489705	0.435	0.599	5.46123e-34	8.50587e-30		Cd86	0.41014	0.86	0.666	4.68601e-62	7.29846e-58		S100a6	-1.33836	0.401	0.507	4.8726e-27	7.58907e-23		Card19	-0.426509	0.26	0.495	5.87112e-19	9.14426e-15		Eif2ak2	0.641629	0.538	0.157	1.11495e-67	1.73653e-63		Snx6	0.563071	0.623	0.358	1.46176e-08	0.000227669		Pitpna	0.418141	0.812	0.597	3.23729e-30	5.04208e-26
	Ubc	-0.490182	0.979	0.989	1.44088e-49	2.24417e-45		Skil	0.408491	0.756	0.57	1.46168e-52	2.27656e-48		Ifitm3	-1.36201	0.656	0.767	1.78186e-70	2.77525e-66		Cdk2ap2	-0.426833	0.476	0.663	4.58521e-11	7.14146e-07		Stat2	0.637839	0.473	0.123	1.90392e-66	2.96535e-62		Clec4a1	0.560259	0.508	0.239	2.44001e-08	0.000380032		Anxa1	0.415604	0.617	0.25	1.3726e-56	2.13782e-52
	Plaur	-0.49607	0.243	0.413	4.41488e-28	6.87618e-24		Mef2c	0.407387	0.797	0.615	1.27946e-52	1.99277e-48		Plac8	-1.94762	0.284	0.412	5.39071e-26	8.39604e-22		Pfn1	-0.427172	0.946	0.988	7.21336e-45	1.12348e-40		A530040E14Rik	0.628015	0.418	0.101	4.80367e-62	7.48172e-58		Marcks	0.555282	0.869	0.787	7.54377e-10	1.17494e-05		Napsa	0.414356	0.748	0.339	1.68511e-58	2.62455e-54
	Jun	-0.498792	0.925	0.948	4.05581e-32	6.31693e-28		H3f3b	0.405595	1	0.996	4.90924e-71	7.64614e-67									Cfp	-0.432468	0.081	0.264	3.54494e-17	5.52124e-13		Slfn8	0.626476	0.52	0.144	1.79675e-67	2.79844e-63		Csf1r	0.549629	0.951	0.85	7.61945e-09	0.000118673		Rpl36al	0.412912	0.982	0.9	2.6445e-54	4.11881e-50
	Actg1	-0.502733	0.99	0.987	8.72643e-78	1.35914e-73		Prdx6	-0.40819	0.399	0.554	5.44361e-19	8.47842e-15									Arpc5	-0.435928	0.63	0.858	4.24568e-35	6.61265e-31		Cmpk2	0.626379	0.282	0.026	1.82708e-102	2.84568e-98		C1qc	0.547233	1	0.916	5.15769e-15	8.0331e-11		Clec4a3	0.411925	0.752	0.516	2.40101e-28	3.73957e-24
	Mif	-0.508571	0.62	0.708	1.31122e-16	2.04222e-12		Card19	-0.408824	0.349	0.5	7.30496e-17	1.13775e-12									Coro1a	-0.438207	0.849	0.956	7.17112e-35	1.1169e-30		Oas1a	0.625826	0.623	0.251	4.82022e-54	7.50749e-50		Slc9a9	0.54625	0.475	0.136	2.38379e-15	3.71276e-11		H3f3a	0.411696	0.989	0.969	6.42852e-64	1.00124e-59
	AA467197	-0.509209	0.254	0.326	1.14804e-07	0.00178808		Emp3	-0.4096	0.58	0.659	1.45565e-17	2.26718e-13									Gpx1	-0.447808	0.835	0.935	4.64782e-28	7.23898e-24		Ube2l6	0.625219	0.546	0.19	2.84561e-56	4.43204e-52		Adgre1	0.54406	0.836	0.659	1.96438e-06	0.0305952		Hif1a	0.408101	0.514	0.264	4.4787e-31	6.97557e-27
	Cd14	-0.520029	0.729	0.723	3.11236e-09	4.84749e-05		Emb	-0.411951	0.162	0.339	1.86828e-26	2.90985e-22									Sub1	-0.45624	0.605	0.835	2.84442e-29	4.43018e-25		Fam26f	0.625118	0.473	0.166	2.82451e-44	4.39918e-40		Dok2	0.540232	0.279	0.064	9.75843e-12	1.51988e-07		Nme1	0.406484	0.8	0.545	9.59043e-33	1.49371e-28
	Hsp90aa1	-0.521786	0.845	0.907	3.56267e-23	5.54886e-19		Pfn1	-0.4144	0.99	0.983	4.17082e-78	6.49605e-74									Tspo	-0.458298	0.655	0.858	3.66064e-25	5.70145e-21		Sp100	0.618654	0.678	0.347	2.10697e-43	3.28161e-39		Smagp	0.538073	0.541	0.245	7.54351e-10	1.1749e-05		Metrnl	0.406482	0.688	0.445	2.74984e-28	4.28287e-24
	Ccnl1	-0.533142	0.716	0.872	4.17117e-70	6.4966e-66		Il1b	-0.419312	0.856	0.781	1.82583e-16	2.84373e-12									Emb	-0.469441	0.12	0.327	1.80705e-20	2.81448e-16		Gbp2	0.61861	0.392	0.087	1.50934e-62	2.3508e-58		Ms4a6b	0.53349	0.787	0.628	1.03183e-07	0.00160707		Camk1	-0.405733	0.594	0.674	1.64855e-19	2.56762e-15
	Bhlhe40	-0.539717	0.1	0.313	4.37357e-44	6.81183e-40		Atp5l	-0.420054	0.864	0.921	1.62147e-68	2.52544e-64									Eno1	-0.478004	0.53	0.766	1.34411e-25	2.09346e-21		Ly6e	0.611699	0.978	0.834	3.65644e-42	5.69491e-38		Pmp22	0.532067	0.361	0.052	2.50783e-26	3.90595e-22		Man2b1	-0.411624	0.674	0.765	3.51149e-21	5.46915e-17
	Samsn1	-0.540714	0.23	0.373	1.04161e-20	1.62231e-16		Arhgdib	-0.420329	0.75	0.837	9.5099e-39	1.48117e-34									AA467197	-0.478787	0.187	0.324	3.13816e-09	4.88768e-05		Daxx	0.608896	0.516	0.186	1.04255e-49	1.62377e-45		Serpinb6a	0.528624	0.426	0.176	1.88458e-08	0.000293523		Ogt	-0.412051	0.397	0.56	3.01618e-18	4.69771e-14
	Dusp2	-0.543507	0.134	0.331	7.20157e-36	1.12164e-31		Cfp	-0.435015	0.108	0.276	5.55187e-26	8.64704e-22									Ninj1	-0.482634	0.239	0.468	1.89182e-18	2.94652e-14		H2-T23	0.608849	0.945	0.748	3.84792e-42	5.99314e-38		Clec4a2	0.528409	0.869	0.659	2.02919e-09	3.16046e-05		H2-Ab1	-0.413275	0.998	0.993	6.91503e-24	1.07702e-19
	Trib1	-0.544199	0.318	0.555	3.73899e-49	5.82347e-45		Rtp4	-0.435044	0.186	0.362	3.91203e-25	6.09298e-21									Actg1	-0.483013	0.95	0.991	1.03743e-36	1.6158e-32		Cd72	0.606199	0.963	0.757	5.21142e-38	8.11679e-34		Itsn1	0.527304	0.344	0.052	5.02656e-24	7.82887e-20		Sat1	-0.414407	0.963	0.971	3.10723e-25	4.83952e-21
	Fosb	-0.548713	0.577	0.714	2.81927e-35	4.39101e-31		Atp5e	-0.43572	0.799	0.886	3.8386e-66	5.97861e-62									Adgre5	-0.495782	0.047	0.28	5.08878e-26	7.92578e-22		Slfn5	0.597255	0.476	0.131	4.93697e-60	7.68934e-56		Blvrb	0.525107	0.738	0.553	2.60637e-06	0.0405941		Lair1	-0.417798	0.709	0.776	1.05071e-20	1.63649e-16
	Ptp4a1	-0.549057	0.296	0.559	6.94389e-56	1.08151e-51		AB124611	-0.442491	0.171	0.385	1.06813e-33	1.66361e-29									Mrpl33	-0.498462	0.35	0.588	2.05997e-22	3.2084e-18		Dhx58	0.590404	0.498	0.14	5.29921e-63	8.25352e-59		Hfe	0.524921	0.672	0.398	1.73256e-09	2.69846e-05		Blnk	-0.41895	0.241	0.476	6.29728e-25	9.80802e-21
	Plek	-0.549788	0.535	0.693	3.70061e-33	5.76371e-29		Samhd1	-0.446349	0.373	0.57	1.23879e-30	1.92942e-26									Smpdl3a	-0.50923	0.235	0.444	2.08522e-17	3.24773e-13		Gm4951	0.58824	0.315	0.015	8.0167e-175	1.2486e-170		mt-Nd1	0.522111	1	0.959	1.09487e-06	0.0170526		Serinc3	-0.420617	0.83	0.875	1.48022e-20	2.30544e-16
	Rgs1	-0.550069	0.886	0.892	2.267e-17	3.53085e-13		Cd44	-0.447433	0.342	0.455	7.61961e-14	1.18675e-09									Txn1	-0.516232	0.567	0.773	1.28975e-22	2.00878e-18		Tap1	0.581291	0.67	0.388	1.41433e-32	2.20282e-28		Ap2a2	0.520915	0.508	0.282	2.29568e-06	0.0357552		Cd86	-0.421984	0.626	0.705	8.9491e-16	1.39382e-11
	Pkm	-0.555109	0.763	0.832	1.0552e-41	1.64348e-37		Sh3bgrl3	-0.448199	0.977	0.986	3.65253e-109	5.68882e-105									Ccl9	-0.520562	0.451	0.592	3.72066e-11	5.79492e-07		Ccnd2	0.569769	0.56	0.264	1.69466e-31	2.63943e-27		Lgmn	0.519931	0.984	0.904	5.72807e-10	8.92148e-06		Irf8	-0.424814	0.771	0.808	2.66315e-19	4.14786e-15
	Tnfaip3	-0.566983	0.117	0.379	2.20774e-58	3.43855e-54		Ldha	-0.448934	0.755	0.84	9.63035e-36	1.49993e-31									H2afz	-0.525968	0.772	0.906	2.42678e-32	3.77971e-28		Ifi35	0.563495	0.648	0.331	4.49104e-39	6.9948e-35		C1qa	0.517041	1	0.936	3.74649e-14	5.83515e-10		Glipr1	-0.43041	0.484	0.616	1.42679e-17	2.22223e-13
	Napsa	-0.569885	0.246	0.403	2.12267e-27	3.30605e-23		Gngt2	-0.45053	0.783	0.842	1.70949e-25	2.66253e-21									Capg	-0.52837	0.068	0.252	1.42807e-18	2.22422e-14		March5	0.561008	0.626	0.369	1.38122e-32	2.15124e-28		Trem2	0.511361	0.885	0.625	1.97303e-08	0.000307299		Slamf7	-0.433969	0.273	0.477	2.64953e-21	4.12664e-17
	Adgre5	-0.570393	0.065	0.306	2.11806e-55	3.29888e-51		Prdx5	-0.451431	0.814	0.877	1.77025e-31	2.75717e-27									Cd14	-0.534862	0.569	0.739	1.18919e-13	1.85216e-09		Ccl4	0.556781	0.952	0.884	7.26928e-19	1.13219e-14		P2ry12	0.507392	0.492	0.191	7.402e-11	1.15286e-06		Il1a	-0.434028	0.167	0.317	1.97172e-12	3.07095e-08
	Srgn	-0.593055	0.952	0.953	1.44108e-32	2.24448e-28		Cstb	-0.478428	0.681	0.772	1.49275e-20	2.32496e-16									Rplp0	-0.537942	0.937	0.982	2.13451e-53	3.3245e-49		Ly6a	0.549912	0.319	0.164	2.63575e-12	4.10517e-08		Mef2c	0.506372	0.82	0.643	1.82257e-06	0.0283865		H2-Eb1	-0.43838	0.986	0.975	4.68958e-29	7.30402e-25
	Lgals3	-0.597007	0.868	0.878	1.02848e-35	1.60186e-31		Samsn1	-0.487103	0.241	0.367	1.43729e-13	2.23858e-09									Pla2g7	-0.542118	0.377	0.618	1.91194e-27	2.97785e-23		H2-T22	0.543165	0.648	0.4	1.32849e-30	2.06913e-26		Cd93	0.505335	0.328	0.091	2.23492e-11	3.48088e-07		Itm2b	-0.441796	0.982	0.983	1.13666e-39	1.77034e-35
	Capg	-0.59755	0.077	0.273	1.83051e-41	2.85102e-37		Smpdl3a	-0.490371	0.273	0.457	1.02858e-25	1.60201e-21									Anxa1	-0.562394	0.102	0.297	6.71762e-19	1.04627e-14		Clec2d	0.530472	0.484	0.227	1.11513e-27	1.73681e-23		Sesn1	0.503776	0.393	0.163	1.13697e-07	0.00177084		Rhob	-0.443535	0.594	0.648	8.63556e-11	1.34499e-06
	Cd44	-0.6085	0.26	0.477	7.73205e-44	1.20427e-39		Pgam1	-0.490596	0.481	0.657	7.66268e-31	1.19346e-26									Ctsd	-0.575359	0.781	0.856	2.90833e-08	0.000452973		Sp140	0.516535	0.689	0.401	2.21661e-31	3.45236e-27		mt-Cytb	0.493663	1	0.953	1.06484e-07	0.00165849		Fyb	-0.443807	0.899	0.884	7.32693e-24	1.14117e-19
	Hmgb2	-0.610735	0.568	0.733	2.3328e-46	3.63334e-42		Clec4a1	-0.500339	0.055	0.279	8.13441e-45	1.26693e-40									Napsa	-0.588419	0.181	0.391	3.53482e-20	5.50548e-16		9930111J21Rik2	0.513686	0.582	0.338	2.51214e-25	3.91266e-21		Calm2	0.475953	0.902	0.815	9.91835e-10	1.54478e-05		Basp1	-0.446617	0.541	0.72	2.92809e-21	4.5605e-17
	Anxa1	-0.639911	0.108	0.321	1.37064e-44	2.13477e-40		Gmfg	-0.50526	0.407	0.632	9.22799e-41	1.43726e-36									Srgn	-0.597093	0.822	0.965	1.97207e-21	3.0715e-17		Parp9	0.506571	0.484	0.157	1.62788e-50	2.53543e-46		Aplp2	0.46007	0.525	0.274	2.07419e-07	0.00323055		Timp2	-0.454934	0.429	0.596	3.6884e-22	5.74468e-18
	Csrnp1	-0.645596	0.05	0.319	2.51832e-66	3.92229e-62		Cdk2ap2	-0.525228	0.534	0.669	2.96189e-22	4.61314e-18									H3f3a	-0.599504	0.894	0.978	7.88042e-50	1.22738e-45		Trafd1	0.503541	0.623	0.392	9.09963e-24	1.41727e-19		Msr1	0.459662	0.426	0.195	7.81377e-07	0.0121699		Gatm	-0.456316	0.489	0.658	1.65523e-23	2.57801e-19
	Tnf	-0.646605	0.305	0.512	8.2443e-40	1.28405e-35		H3f3a	-0.527579	0.964	0.972	1.30396e-66	2.03091e-62									Cd9	-0.61696	0.237	0.456	2.40785e-18	3.75022e-14		Ifitm3	0.500658	0.982	0.737	1.96503e-45	3.06053e-41		Hacd4	0.45405	0.541	0.293	2.02772e-07	0.00315817		Gpr65	-0.45883	0.456	0.582	1.75436e-17	2.73241e-13
	Ccr2	-0.64751	0.159	0.329	8.37184e-30	1.30391e-25		Wfdc17	-0.528757	0.876	0.912	3.61292e-23	5.62712e-19									Lpl	-0.641882	0.117	0.384	1.80271e-27	2.80773e-23		Znfx1	0.497983	0.447	0.136	3.36016e-49	5.23344e-45		Aoah	0.453905	0.311	0.052	1.01149e-19	1.5754e-15		Tnfsf13b	-0.462879	0.177	0.422	2.38018e-27	3.70712e-23
	Mcl1	-0.648355	0.583	0.815	1.44661e-91	2.25309e-87		Capg	-0.532471	0.105	0.262	1.01475e-25	1.58047e-21									Lgals3	-0.65887	0.743	0.889	1.19305e-32	1.85817e-28		Igtp	0.496501	0.421	0.112	5.24776e-55	8.17339e-51		Slco2b1	0.450498	0.443	0.198	5.14454e-08	0.000801262		Id2	-0.463004	0.589	0.605	2.29692e-05	0.357745
	H3f3b	-0.65067	0.993	0.997	1.72398e-135	2.6851e-131		Irf7	-0.539418	0.221	0.428	1.76476e-30	2.74862e-26									Clec4n	-0.659574	0.151	0.436	6.24934e-31	9.73334e-27		Ifi205	0.496417	0.271	0.051	1.12381e-48	1.75034e-44		Il10rb	0.449373	0.869	0.672	4.39045e-08	0.000683813		Lgmn	-0.469309	0.95	0.901	1.16674e-22	1.8172e-18
	Jund	-0.654658	0.792	0.896	5.53327e-71	8.61806e-67		Sec61b	-0.547663	0.629	0.795	2.76747e-64	4.31033e-60									Cd44	-0.672991	0.158	0.462	1.38961e-34	2.16431e-30		Pttg1	0.490859	0.593	0.279	1.93824e-36	3.0188e-32		Pdlim4	0.438131	0.508	0.24	6.32745e-08	0.000985501		Ubc	-0.46983	0.982	0.987	9.23041e-22	1.43764e-17
	Klf4	-0.655678	0.181	0.45	2.91571e-56	4.54122e-52		Tspo	-0.548601	0.757	0.857	1.17654e-57	1.83246e-53									Emp3	-0.708778	0.318	0.677	6.61272e-48	1.02993e-43		Cd86	0.482448	0.824	0.691	1.2036e-18	1.8746e-14		Ctsb	0.436579	0.984	0.97	7.43037e-10	1.15728e-05		Qpct	-0.476301	0.248	0.437	7.42571e-20	1.15655e-15
	Lmnb1	-0.658174	0.167	0.336	6.74438e-28	1.05044e-23		Lmnb1	-0.549394	0.2	0.324	1.34341e-13	2.09236e-09									Ccr1	-0.735702	0.214	0.546	1.1429e-36	1.78006e-32		Apobec3	0.479171	0.579	0.305	2.07947e-28	3.23877e-24		Ophn1	0.431368	0.508	0.226	1.27601e-08	0.000198738		Tmem86a	-0.484249	0.392	0.556	6.89047e-21	1.07319e-16
	Btg1	-0.669354	0.881	0.95	2.96638e-76	4.62014e-72		Pkm	-0.555526	0.737	0.835	7.35641e-40	1.14576e-35									Gsr	-0.762624	0.093	0.353	4.10518e-29	6.39383e-25		Tpst1	0.477791	0.41	0.109	4.74539e-53	7.39095e-49		Cd81	0.429316	1	0.836	1.83948e-08	0.0002865		Slamf9	-0.498138	0.544	0.717	2.37289e-27	3.69577e-23
	Tagln2	-0.676223	0.375	0.573	3.94826e-46	6.14941e-42		Lcn2	-0.560232	0.247	0.38	1.67018e-12	2.60131e-08									Ccr2	-0.768207	0.102	0.315	7.24563e-22	1.12851e-17		Parp12	0.47686	0.462	0.153	6.11231e-46	9.51992e-42		Clta	0.42839	0.967	0.928	9.13946e-09	0.000142347		Cd83	-0.501163	0.475	0.577	4.97963e-12	7.75577e-08
	Socs3	-0.676623	0.652	0.81	3.25488e-59	5.06947e-55		Shfm1	-0.562811	0.787	0.897	2.71062e-84	4.22179e-80									Ier3	-0.7878	0.296	0.493	5.77168e-15	8.9894e-11		Ms4a6b	0.473887	0.799	0.621	2.15046e-21	3.34934e-17		Rin2	0.424062	0.492	0.244	6.39072e-07	0.00995355		Ctsz	-0.502189	0.968	0.96	6.28349e-45	9.78653e-41
	Isg15	-0.678648	0.305	0.395	9.91827e-11	1.54477e-06		Tpi1	-0.56761	0.472	0.665	1.40024e-36	2.18087e-32									Marcksl1	-0.806909	0.108	0.303	1.29455e-17	2.01627e-13		Pnp	0.470601	0.67	0.433	5.17307e-24	8.05706e-20		Pld3	0.422243	0.639	0.368	7.14619e-07	0.0111302		Olfml3	-0.509692	0.163	0.403	1.67017e-27	2.60129e-23
	Pnrc1	-0.701027	0.606	0.802	2.18243e-64	3.39914e-60		Sirpb1c	-0.575802	0.138	0.348	8.58376e-37	1.33692e-32									Alox5ap	-0.808615	0.483	0.75	6.3869e-40	9.94759e-36		Frmd4a	0.465631	0.535	0.277	2.29655e-26	3.57687e-22		Acp2	0.415789	0.475	0.23	3.52734e-07	0.00549383		Ctss	-0.510454	0.993	0.985	8.59952e-38	1.33937e-33
	Egr1	-0.718469	0.397	0.614	1.77823e-48	2.7696e-44		Aldoa	-0.5797	0.773	0.867	4.81314e-47	7.49647e-43									Tagln2	-0.817308	0.214	0.566	2.61274e-44	4.06935e-40		Oas1g	0.465561	0.374	0.094	1.77004e-51	2.75684e-47		Ap1b1	0.407901	0.41	0.153	2.54058e-09	3.95695e-05		Cst3	-0.513437	0.993	0.995	3.43356e-51	5.34776e-47
	Gsr	-0.719155	0.187	0.364	2.21378e-32	3.44796e-28		Eno1	-0.586369	0.601	0.775	9.24778e-54	1.44034e-49									Ccl6	-0.818041	0.415	0.613	4.03486e-18	6.28429e-14		Ddx58	0.462142	0.348	0.084	1.19789e-49	1.86571e-45		Rplp0	-0.437481	1	0.978	1.41756e-06	0.0220785		Cxcl2	-0.518273	0.78	0.698	1.26618e-05	0.197208
	Osm	-0.739892	0.164	0.373	1.38637e-40	2.15926e-36		AA467197	-0.596153	0.217	0.331	9.75375e-13	1.51915e-08									Lyz2	-0.852235	0.959	0.979	7.49683e-22	1.16763e-17		Slamf7	0.4616	0.67	0.449	6.53037e-21	1.0171e-16		Pkib	-0.479752	0.164	0.488	1.38512e-06	0.0215733		Gdf3	-0.521694	0.211	0.289	1.33495e-05	0.207919
	Ppp1r15a	-0.744587	0.457	0.732	3.37732e-80	5.26018e-76		Mrpl33	-0.598942	0.352	0.611	1.68879e-52	2.63029e-48									S100a10	-0.890168	0.223	0.454	4.36837e-23	6.80373e-19		Axl	0.460625	0.846	0.658	7.54358e-25	1.17491e-20		Rpsa	-0.481785	0.951	0.959	1.62061e-08	0.00025241		Ptgs1	-0.532806	0.197	0.439	2.92767e-27	4.55985e-23
	Nfkbiz	-0.746316	0.461	0.705	5.91881e-76	9.21854e-72		Tagln2	-0.601816	0.41	0.561	1.77192e-27	2.75976e-23									Msrb1	-0.917442	0.483	0.778	5.19577e-41	8.09242e-37		Etnk1	0.459104	0.451	0.19	4.77949e-29	7.44405e-25		Ccdc12	-0.498943	0.623	0.812	8.75041e-08	0.00136288		Lpcat2	-0.536285	0.567	0.711	2.09537e-28	3.26354e-24
	Dnajb1	-0.765585	0.507	0.668	1.85766e-29	2.89331e-25		Ms4a4c	-0.614517	0.219	0.427	9.74895e-34	1.5184e-29									Mmp12	-0.945539	0.106	0.28	2.65723e-15	4.13864e-11		Mitd1	0.454473	0.344	0.133	4.27208e-26	6.65376e-22		Itgax	-0.520242	0.23	0.571	6.83378e-07	0.0106436		Scimp	-0.537101	0.491	0.663	1.00561e-28	1.56624e-24
	Msrb1	-0.766642	0.69	0.768	8.13937e-34	1.26771e-29		Isg15	-0.619133	0.263	0.401	5.12402e-15	7.98065e-11									Lgals1	-0.956653	0.212	0.533	2.68009e-41	4.17423e-37		Ccdc86	0.453369	0.535	0.343	4.54299e-18	7.0757e-14		Fam46c	-0.537731	0.098	0.416	1.70978e-06	0.0266298		Cxcl16	-0.542516	0.729	0.846	2.20164e-40	3.42906e-36
	Ccl2	-0.767516	0.174	0.371	3.46384e-35	5.39493e-31		Gapdh	-0.632519	0.929	0.954	1.02929e-88	1.60311e-84									Anxa2	-0.97766	0.079	0.407	4.52307e-42	7.04468e-38		Trim30d	0.451056	0.432	0.147	1.62536e-39	2.53149e-35		Fxyd5	-0.546653	0.836	0.945	1.22064e-08	0.000190114		Bst2	-0.543909	0.773	0.855	4.46904e-27	6.96054e-23
	Alox5ap	-0.773617	0.613	0.755	4.35243e-59	6.7789e-55		Napsa	-0.632971	0.195	0.408	1.99861e-37	3.11283e-33									Ifitm2	-0.979402	0.508	0.68	4.13778e-21	6.44459e-17		Dnase1l3	0.450837	0.278	0.095	4.33258e-23	6.748e-19		Btg2	-0.572571	0.705	0.912	1.25446e-06	0.0195382		Gm26522	-0.545765	0.266	0.378	2.0967e-09	3.2656e-05
	Ier2	-0.777798	0.606	0.831	3.5795e-91	5.57507e-87		Anxa1	-0.643979	0.091	0.319	4.63389e-44	7.21728e-40									Tmsb10	-1.03604	0.587	0.65	1.23856e-07	0.00192906		Samd9l	0.450328	0.407	0.162	7.27566e-28	1.13318e-23		Runx3	-0.576809	0.164	0.518	5.43029e-08	0.000845767		Pmepa1	-0.550419	0.317	0.592	5.72172e-34	8.91157e-30
	Neat1	-0.780719	0.51	0.796	2.14109e-101	3.33476e-97		Slfn2	-0.645593	0.391	0.622	2.12929e-46	3.31636e-42									S100a11	-1.12527	0.343	0.623	2.16203e-33	3.36735e-29		Bcl2a1a	0.448061	0.678	0.475	6.78253e-18	1.05638e-13		Fth1	-0.586941	1	1	2.36445e-10	3.68263e-06		Cd74	-0.556352	0.998	0.99	1.01234e-36	1.57671e-32
	Id2	-0.795701	0.423	0.647	1.27673e-51	1.98851e-47		Ccr2	-0.661859	0.166	0.323	7.3301e-24	1.14166e-19									Lsp1	-1.19061	0.151	0.552	1.98451e-59	3.09088e-55		Themis2	0.447628	0.593	0.358	8.42893e-22	1.31281e-17		Ier5	-0.601683	0.754	0.902	6.51111e-09	0.00010141		AW112010	-0.559704	0.727	0.809	2.14094e-24	3.33451e-20
	Fos	-0.799453	0.896	0.951	5.67949e-88	8.8458e-84		Txn1	-0.686675	0.585	0.789	2.0434e-68	3.1826e-64									Vim	-1.29373	0.221	0.588	2.07321e-52	3.22902e-48		Irf1	0.447441	0.484	0.296	9.39836e-15	1.46379e-10		Bcl2a1d	-0.608021	0.213	0.548	4.38816e-07	0.00683456		Bcl2a1b	-0.579447	0.683	0.857	1.37568e-40	2.14263e-36
	Zfp36	-0.801349	0.77	0.921	2.7945e-121	4.35243e-117		Lgals3	-0.703679	0.841	0.883	3.22866e-47	5.02863e-43									S100a4	-1.40494	0.097	0.337	2.36644e-27	3.68573e-23		Cd47	0.446516	0.883	0.729	8.08692e-23	1.25954e-18		Qpct	-0.609664	0.131	0.424	2.23068e-06	0.0347428		Btg2	-0.581168	0.906	0.91	3.7827e-20	5.89156e-16
	Klf6	-0.802801	0.806	0.908	2.15373e-83	3.35443e-79		Gsr	-0.710782	0.177	0.361	7.18107e-30	1.11845e-25									S100a6	-1.48803	0.201	0.517	2.44489e-39	3.80792e-35		Stx16	0.443862	0.718	0.517	3.4495e-19	5.3726e-15		Actg1	-0.630543	0.918	0.988	8.95482e-10	1.39471e-05		Ctsb	-0.592565	0.968	0.971	3.32984e-39	5.18622e-35
	Klf2	-0.807508	0.514	0.739	5.46205e-58	8.50714e-54		Ly6e	-0.724822	0.73	0.864	1.599e-71	2.49045e-67									Cxcl2	-1.49915	0.549	0.72	9.20936e-14	1.43436e-09		Samhd1	0.438584	0.747	0.525	1.9708e-22	3.06952e-18		Glipr1	-0.664536	0.23	0.609	9.94983e-09	0.000154969		Malat1	-0.614197	1	0.996	3.87136e-71	6.02965e-67
	Lgals1	-0.826304	0.331	0.547	1.44463e-48	2.25001e-44		Mif	-0.73785	0.543	0.721	5.01173e-41	7.80577e-37									Crip1	-1.61748	0.381	0.734	1.19455e-63	1.86052e-59		Rasa4	0.433543	0.513	0.262	1.19661e-24	1.86372e-20		Basp1	-0.695495	0.525	0.708	1.02595e-06	0.0159792		Ctsd	-0.615447	0.885	0.846	1.30495e-05	0.203247
	Ccl3	-0.833608	0.813	0.839	1.03858e-18	1.61759e-14		Ccl6	-0.765466	0.526	0.611	6.47062e-13	1.0078e-08									Plac8	-2.00039	0.187	0.411	4.36767e-23	6.80264e-19		Lap3	0.427208	0.615	0.415	4.09976e-18	6.38538e-14		Zfp36	-0.715102	0.705	0.895	8.42259e-09	0.000131182		Hsp90aa1	-0.621938	0.894	0.895	3.59752e-15	5.60313e-11
	Marcksl1	-0.877135	0.128	0.323	4.78259e-37	7.44888e-33		Msrb1	-0.767001	0.674	0.769	5.96688e-32	9.29342e-28																Aif1	0.426558	0.982	0.859	5.32111e-32	8.28764e-28		Gapdh	-0.719504	0.803	0.952	2.90867e-10	4.53025e-06		C1qb	-0.630961	0.959	0.953	7.84093e-48	1.22122e-43
	Ifrd1	-0.907998	0.257	0.571	1.95977e-83	3.05234e-79		Gadd45b	-0.777468	0.278	0.385	3.34115e-11	5.20384e-07																Ctla2b	0.419849	0.421	0.184	3.60547e-24	5.61551e-20		Btg1	-0.719901	0.77	0.939	2.38077e-08	0.000370806		Tmem119	-0.632059	0.45	0.65	8.06753e-29	1.25652e-24
	Cdkn1a	-0.914139	0.208	0.489	1.43904e-62	2.24131e-58		Lgals1	-0.80246	0.379	0.531	2.26563e-31	3.52873e-27																Tmem171	0.419848	0.264	0.05	1.08415e-47	1.68856e-43		Junb	-0.756423	0.836	0.954	5.36971e-08	0.000836333		Tgfbr1	-0.63787	0.564	0.735	4.53086e-35	7.05681e-31
	Nr4a1	-0.919349	0.125	0.414	2.40572e-71	3.7469e-67		Alox5ap	-0.807697	0.591	0.755	2.0516e-62	3.19537e-58																Pydc3	0.419781	0.264	0.017	3.31779e-122	5.16745e-118		Rgs2	-0.816761	0.689	0.918	9.84955e-10	1.53407e-05		Hspa1a	-0.647237	0.878	0.908	2.45476e-22	3.82329e-18
	S100a10	-0.941269	0.276	0.472	7.51602e-43	1.17062e-38		Lsp1	-0.89435	0.365	0.548	3.98496e-42	6.20657e-38																Il10ra	0.419053	0.703	0.485	3.68268e-21	5.73577e-17		Gsr	-0.855274	0.033	0.334	7.92642e-07	0.0123454		Gm26825	-0.649086	0.404	0.573	2.60298e-18	4.05415e-14
	Ccl4	-0.959952	0.862	0.893	1.11679e-29	1.7394e-25		S100a10	-0.958615	0.265	0.468	3.2565e-39	5.072e-35																Tapbp	0.41641	0.784	0.637	2.14485e-20	3.3406e-16		Nr4a1	-0.884652	0.066	0.363	1.53676e-06	0.0239351		Tmcc3	-0.652765	0.255	0.546	5.6646e-38	8.82261e-34
	Junb	-0.965829	0.883	0.969	3.56748e-138	5.55635e-134		Anxa2	-1.0182	0.129	0.429	2.96247e-68	4.61404e-64																B2m	0.415779	1	0.999	4.81228e-52	7.49512e-48		Srgn	-0.962941	0.852	0.954	3.86689e-12	6.02268e-08		Lilra5	-0.666174	0.211	0.519	1.12251e-40	1.74831e-36
	Lsp1	-0.98818	0.307	0.567	3.41718e-71	5.32225e-67		Ifi27l2a	-1.03102	0.61	0.771	2.45482e-59	3.82338e-55																Isg20	0.413943	0.341	0.081	1.29068e-47	2.01023e-43		Atf3	-1.03215	0.557	0.808	1.52477e-09	2.37482e-05		Cd72	-0.703557	0.592	0.785	1.71595e-38	2.67259e-34
	Gadd45b	-1.04435	0.169	0.413	2.42805e-51	3.78169e-47		Gm8730	-1.12345	0.25	0.584	6.24397e-84	9.72498e-80																Srgap2	0.413026	0.462	0.276	2.38062e-15	3.70781e-11		Lgals3	-1.09111	0.689	0.879	2.29179e-11	3.56946e-07		Hpgds	-0.704783	0.351	0.662	4.12959e-47	6.43184e-43
	Anxa2	-1.05505	0.135	0.436	4.68923e-80	7.30348e-76		Crip1	-1.20147	0.674	0.71	3.87882e-22	6.04127e-18																Snx2	0.407309	0.659	0.468	1.62712e-17	2.53423e-13		Rgs1	-1.11816	0.852	0.891	3.22378e-08	0.000502103		Ccl12	-0.724588	0.392	0.465	2.31197e-06	0.036009
	Ifitm3	-1.09696	0.668	0.769	3.46662e-43	5.39927e-39		Vim	-1.21663	0.419	0.585	8.30462e-45	1.29344e-40																Ass1	0.405529	0.289	0.156	9.29942e-11	1.44838e-06		Msrb1	-1.11992	0.459	0.757	7.57329e-10	1.17954e-05		Apoe	-0.768655	1	1	4.64006e-41	7.22689e-37
	Ifitm2	-1.097	0.545	0.694	1.91871e-51	2.98838e-47		Ifitm2	-1.23531	0.455	0.707	3.86197e-77	6.01502e-73																Smpdl3a	-0.414241	0.341	0.431	5.29302e-05	0.824388		Pim1	-1.2201	0.344	0.663	4.68469e-09	7.2964e-05		Dnajb1	-0.773689	0.58	0.643	1.56859e-11	2.44308e-07
	Ier3	-1.10345	0.276	0.523	1.44391e-55	2.24889e-51		Cebpb	-1.23929	0.703	0.751	1.05364e-18	1.64105e-14																Adgre5	-0.424453	0.11	0.269	2.0144e-09	3.13743e-05		Ccl3	-1.26969	0.639	0.836	1.8141e-08	0.000282547		Vcam1	-0.783024	0.172	0.437	4.07833e-32	6.352e-28
	Dusp1	-1.16404	0.683	0.901	1.04424e-144	1.62641e-140		S100a11	-1.32311	0.381	0.642	2.03529e-73	3.16996e-69																Ccr1	-0.428	0.366	0.526	1.78342e-07	0.00277767		Ccrl2	-1.38089	0.311	0.574	1.75692e-06	0.027364		Acp5	-0.809532	0.505	0.738	5.66972e-46	8.83058e-42
	Il1b	-1.21311	0.789	0.795	2.16724e-11	3.37547e-07		S100a4	-1.38463	0.165	0.346	1.46503e-33	2.28179e-29																Napsa	-0.430737	0.212	0.382	4.59459e-09	7.15607e-05		Ccl4	-1.46879	0.803	0.888	1.33481e-06	0.0207896		Cadm1	-0.809907	0.3	0.659	2.95796e-60	4.60702e-56
	S100a11	-1.21415	0.459	0.631	2.70294e-55	4.20984e-51		S100a6	-1.57828	0.328	0.523	1.30635e-42	2.03464e-38																Emb	-0.437979	0.121	0.32	1.08752e-12	1.69382e-08		Il1b	-1.84219	0.525	0.797	4.9192e-10	7.66166e-06		C1qa	-0.839167	0.906	0.94	1.5961e-66	2.48593e-62
	Atf3	-1.36164	0.618	0.849	1.09063e-160	1.69865e-156		Ifitm3	-1.71771	0.508	0.798	1.86144e-126	2.89919e-122																Hist1h1c	-0.445	0.165	0.301	7.73279e-07	0.0120438									C1qc	-0.842379	0.869	0.921	5.78e-69	9.00235e-65
	Ccrl2	-1.36643	0.326	0.628	1.94049e-81	3.02232e-77		Tmsb10	-1.82189	0.394	0.694	3.80047e-103	5.91923e-99																Sirpb1c	-0.452881	0.19	0.32	3.66205e-07	0.00570365									Ccl4	-0.866998	0.881	0.888	1.29725e-14	2.02046e-10
	Crip1	-1.39535	0.605	0.727	1.00501e-58	1.56531e-54		Plac8	-2.00844	0.265	0.417	6.44129e-26	1.00323e-21																Clec4n	-0.463946	0.26	0.42	4.23964e-08	0.000660324									Rgs1	-0.886133	0.858	0.894	8.86139e-32	1.38016e-27
	Vim	-1.4372	0.327	0.611	1.21553e-90	1.89319e-86		S100a8	-2.56043	0.177	0.29	6.59611e-12	1.02734e-07																Card19	-0.490035	0.297	0.485	2.05594e-12	3.20213e-08									Ccl3	-0.904844	0.821	0.835	7.50049e-15	1.1682e-10
	Tmsb10	-1.46122	0.524	0.673	4.38572e-53	6.83075e-49		S100a9	-2.60541	0.142	0.308	7.79392e-23	1.2139e-18																Nr4a1	-0.494425	0.22	0.367	4.92974e-07	0.00767807									Zmynd15	-0.944228	0.372	0.658	4.99191e-51	7.7749e-47
	Nfkbia	-1.47666	0.583	0.842	1.9602e-148	3.05301e-144																							Anxa1	-0.502157	0.154	0.288	1.31376e-07	0.00204618									Hexb	-0.96755	0.851	0.906	4.18433e-67	6.51709e-63
	Pim1	-1.48264	0.307	0.742	2.74799e-180	4.27999e-176																							Cdk2ap2	-0.50536	0.513	0.654	2.63331e-09	4.10138e-05									H2-M2	-0.974487	0.142	0.299	8.14923e-15	1.26924e-10
	S100a4	-1.54969	0.108	0.365	1.16375e-63	1.81254e-59																							Tagln2	-0.509923	0.403	0.543	1.32574e-08	0.000206483									Mmp12	-1.00032	0.17	0.274	1.87815e-08	0.000292522
	Cebpb	-1.57622	0.592	0.778	7.42699e-82	1.15675e-77																							Mrpl33	-0.516365	0.41	0.576	2.20564e-12	3.43528e-08									Ms4a7	-1.02767	0.592	0.804	2.91089e-63	4.53372e-59
	S100a6	-1.70363	0.287	0.538	5.59332e-71	8.7116e-67																							Gpx1	-0.516409	0.832	0.931	2.34033e-22	3.64507e-18									Cd81	-1.05517	0.683	0.852	2.81566e-77	4.38539e-73
	Plac8	-2.12638	0.214	0.434	1.11141e-48	1.73103e-44																							Ctsd	-0.517995	0.784	0.853	4.47994e-07	0.00697751									Cd63	-1.0751	0.665	0.869	6.59439e-81	1.02708e-76
	Cxcl2	-2.44897	0.543	0.743	9.82301e-82	1.52993e-77																							Samsn1	-0.527645	0.198	0.354	1.10488e-08	0.000172085									S100a9	-2.46747	0.206	0.288	1.58265e-05	0.246498
																													H3f3a	-0.549535	0.941	0.972	1.54451e-26	2.40558e-22
																													Cd44	-0.556213	0.227	0.448	6.18624e-14	9.63507e-10
																													Cd14	-0.560237	0.626	0.73	3.29836e-08	0.000513719
																													Emp3	-0.568825	0.476	0.655	1.03472e-16	1.61158e-12
																													Gsr	-0.636872	0.176	0.339	1.2979e-09	2.02147e-05
																													Ccr2	-0.637334	0.114	0.307	9.59541e-12	1.49448e-07
																													Lgals1	-0.646711	0.392	0.512	9.96956e-08	0.00155276
																													Cd9	-0.649271	0.278	0.446	2.51265e-09	3.91345e-05
																													S100a10	-0.658528	0.33	0.441	5.47191e-06	0.0852249
																													Msrb1	-0.689937	0.612	0.761	4.19839e-12	6.53899e-08
																													Lyz2	-0.730162	0.996	0.976	7.6832e-09	0.000119666
																													Alox5ap	-0.74211	0.615	0.734	3.99401e-18	6.22067e-14
																													Ccl6	-0.837684	0.443	0.605	1.96682e-10	3.06332e-06
																													Ifitm2	-0.852774	0.564	0.671	3.36348e-09	5.23863e-05
																													Anxa2	-0.873022	0.128	0.393	1.19836e-19	1.86644e-15
																													Tmsb10	-0.899339	0.59	0.648	2.08488e-06	0.032472
																													Lsp1	-0.940978	0.227	0.534	8.74852e-26	1.36258e-21
																													Ier3	-0.951749	0.326	0.485	2.09241e-10	3.25893e-06
																													S100a11	-1.02107	0.458	0.607	9.19175e-13	1.43161e-08
																													Cebpb	-1.04683	0.648	0.748	2.0835e-07	0.00324505
																													Crip1	-1.10676	0.59	0.71	6.71933e-14	1.04654e-09
																													Vim	-1.20572	0.333	0.569	4.06827e-21	6.33633e-17
																													Cxcl2	-1.22385	0.615	0.71	3.87413e-05	0.603396
																													Plac8	-1.2809	0.278	0.398	4.43491e-07	0.00690737
																													S100a4	-1.30934	0.121	0.327	1.47587e-14	2.29866e-10
																													S100a6	-1.4032	0.326	0.499	9.07391e-14	1.41326e-09
































































































































































































































































































































[truncated: 42 more columns]
