# Supplementary material for: Disabled Homolog 2 Controls Prometastatic Activity of Tumor-Associated Macrophages
Source: Oxford University Press journal article supplement (doi:10.1158/2159-8290.cd-20-0036), 2020-07-10
Supplement: 21598290cd200036-sup-235391_2_supp_6396142_qc22xq.xlsx [file 21598290cd200036-sup-235391_2_supp_6396142_qc22xq.xlsx]

## Sheet: Foglio1
Cluster number	Type	Description	Percent of total	Genes up	Genes down
0	WT	Inflammatory low/inert.	379/1682 22.53%		Cxcl2, Ccl4, Ccl3, Il1b, Ccrl2
1	WT	Metabolism active (Glycolisis, amino acid and carbon), inflammatory low, antigen presenting low.	371/1682 22.05%	Gapdh, Aldoa, Pkm, Tpi1	H2-M2, Cd74, H2-Aa
2	WT	Mixed inflammatory.	367/1682 21.81%	Socs3, Aft3, Mmp12, Tnf, Il1b, Il1a
3	WT	Metabolically inactive, Fos/Jun signaling up.	315/1682 18.72%	Fos, Fosb, Jun	Gapdh, Aldoa, Pkm,Eno1
4	WT	IFN, JAK/STAT, anti-viral response.	163/1682 9.69%	Mmp13, ISGs
5	WT	Pro-tumoral breast, monocyte chemokines up, ribosome down.	87/1682 5.17%	Ccl7, Ccl8, Mrc1	Il1b, Ccl4
0	Dab2 KO	Antigen presenting, inflammatory mixed, chemokines low.	414/1749 23.67%	H2-Aa, H2-Eb1, H2-Ab1, Cd74	Cxcl2, Ccl3, Ccl4, Ccrl2, Atf3, Socs3
1	Dab2 KO	Inflammatory low.	410/1749 23.44%	Trem2, lgals, Ctsd, Cd63	ISGs, Ccl4, Ccl5, Tnf
2	Dab2 KO	Inflammatory high, heat shock response.	261/1749 14.92%	Il1B, Tnf, HSPs, Ccl4	Trem2, lgals3
3	Dab2 KO	Metabolically active (glycolisis), mixed inflammatory,lysosome down.	259/1749 14.80%	Tp1, Aldoa, Pkm, Gapdh, Cxcl12, Il1a, Il1b, Atf3, Socs3, Tnfip3	Lyz2, Ctsd, Ctsb, Pld3, Ftl1
4	Dab2 KO	IFN, anti-viral response, CD40 signalling.	172/1749 9.83%	ISGs, Cd40
5	Dab2 KO	Anti-viral response down	168/1749 9.60%		ISGs
6	Dab2 KO	Inflammatory low.	65/1749 3.71%		Ccl4, Ccl3
